# Supplementary material for: Common Altered Epigenomic Domains in Cancer Cells: Characterization and Subtle Variations
Source: PubMed Central journal article supplement (PMC3757401; doi:10.3390/cancers3021996), 2011-04-18

**1**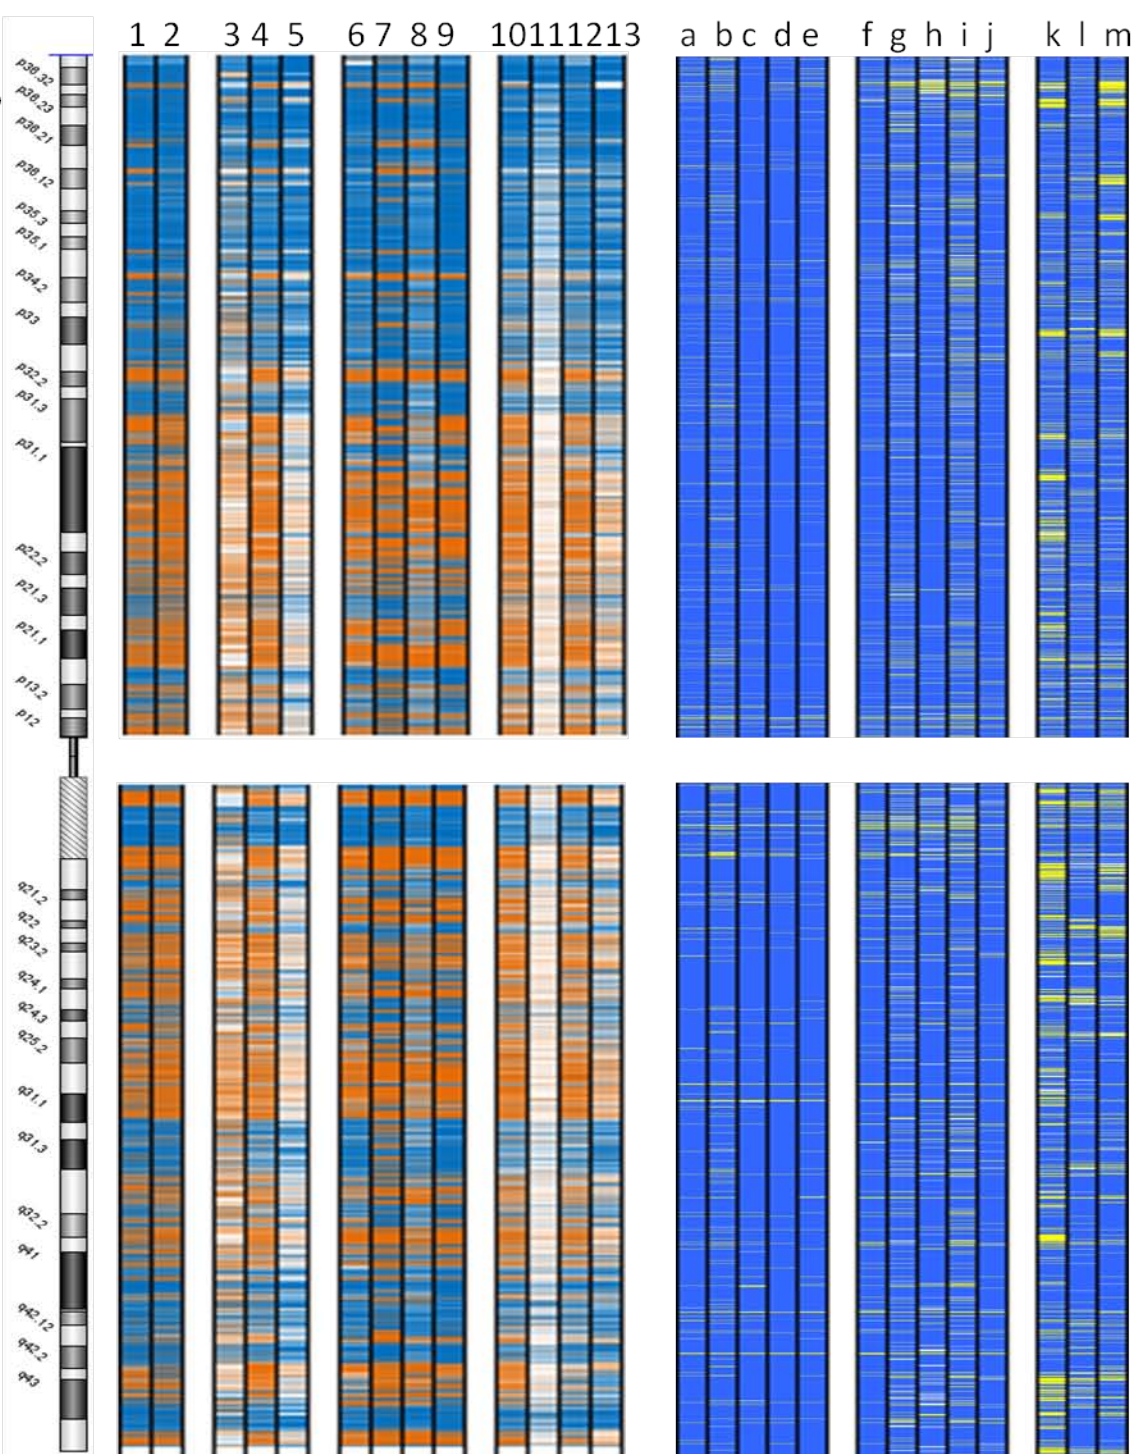

### McrBC method

- 1: FaDu HIF
- 2: Fadu
- 3: Malhavu
- 4: CL15
- 5: MDA-MB-231
- 6: MCF7
- 7: HepG2
- 8: huh7
- 9: CL10
- 10: breast tumor tissue
- 11: brain tumor tissue(no.RT619)
- 12: brain tumor tissue(no.t891)
- 13: brain tumor tissue(no.RT297)

### TspRI-ExoIII method

- a: brain normal tissue
- b: leukocyte normal tissue
- c: testis normal tissue
- d: liver normal tissue
- e: breast normal tissue
- f: breast tumor tissue (no. 146)
- g: breast tumor tissue (no. 125)
- h: breast tumor tissue (no. 93)
- i: breast tumor tissue (no. 89)
- j: brain tumor tissue (no. SIR)
- k: MCF7
- l: MDA-MB-231
- m: HeLa

2

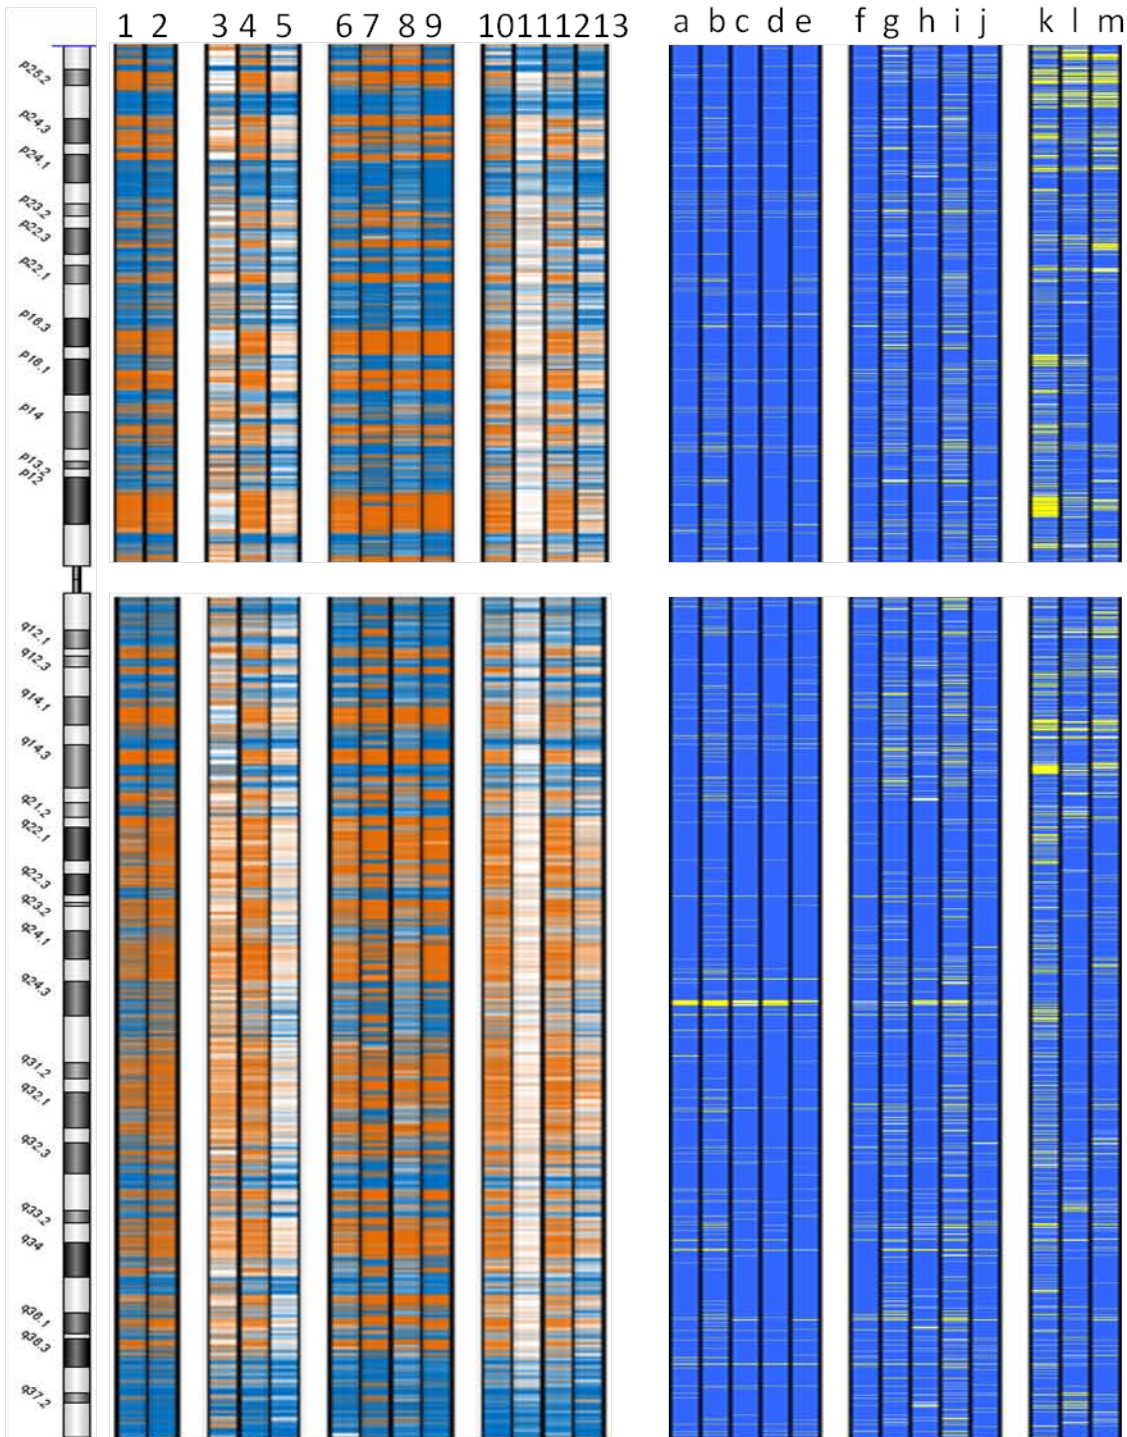

**McrBC method**

- 1: FaDu HIF
- 2: Fadu
- 3: Malhavu
- 4: CL15
- 5: MDA-MB-231
- 6: MCF7
- 7: HepG2
- 8: huh7
- 9: CL10
- 10: breast tumor tissue
- 11: brain tumor tissue(no.RT619)
- 12: brain tumor tissue(no.t891)
- 13: brain tumor tissue(no.RT297)

**TspRI-ExoIII method**

- a: brain normal tissue
- b: leukocyte normal tissue
- c: testis normal tissue
- d: liver normal tissue
- e: breast normal tissue
- f: breast tumor tissue (no. 146)
- g: breast tumor tissue (no. 125)
- h: breast tumor tissue (no. 93)
- i: breast tumor tissue (no. 89)
- j: brain tumor tissue (no. SIR)
- k: MCF7
- l: MDA-MB-231
- m: HeLa

**3**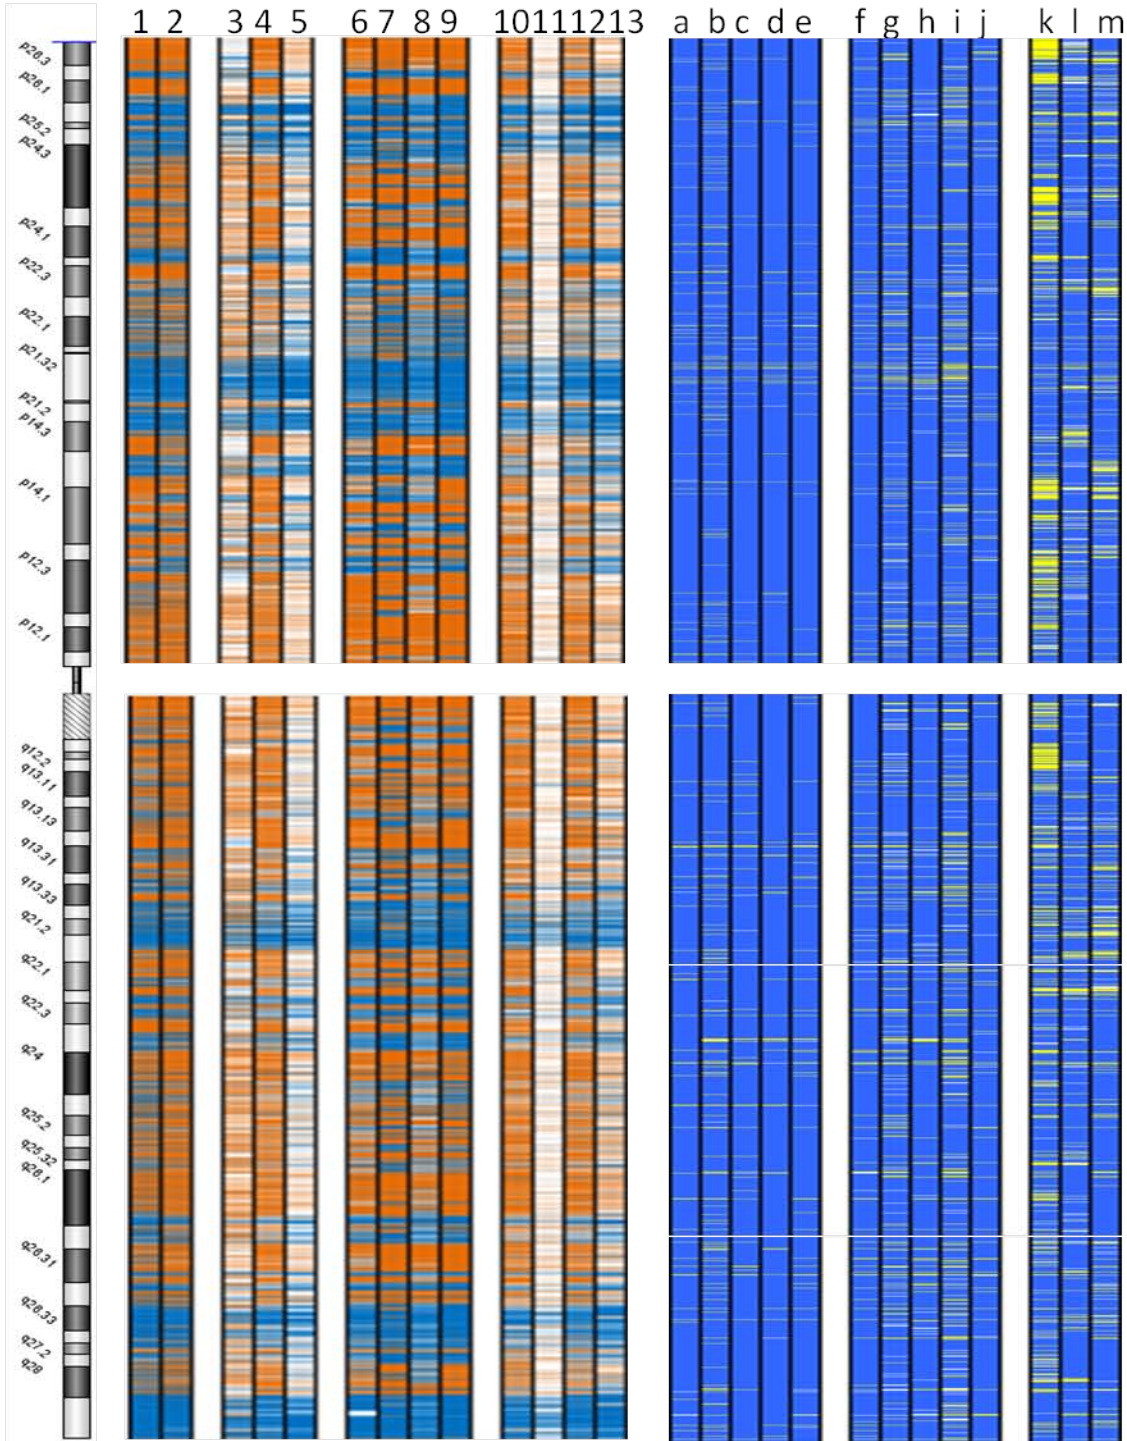**McrBC method**

- 1: FaDu HIF
- 2: Fadu
- 3: Malhavu
- 4: CL15
- 5: MDA-MB-231
- 6: MCF7
- 7: HepG2
- 8: huh7
- 9: CL10
- 10: breast tumor tissue
- 11: brain tumor tissue(no.RT619)
- 12: brain tumor tissue(no.t891)
- 13: brain tumor tissue(no.RT297)

**TspRI-ExoIII method**

- a: brain normal tissue
- b: leukocyte normal tissue
- c: testis normal tissue
- d: liver normal tissue
- e: breast normal tissue
- f: breast tumor tissue (no. 146)
- g: breast tumor tissue (no. 125)
- h: breast tumor tissue (no. 93)
- i: breast tumor tissue (no. 89)
- j: brain tumor tissue (no. SIR)
- k: MCF7
- l: MDA-MB-231
- m: HeLa

4

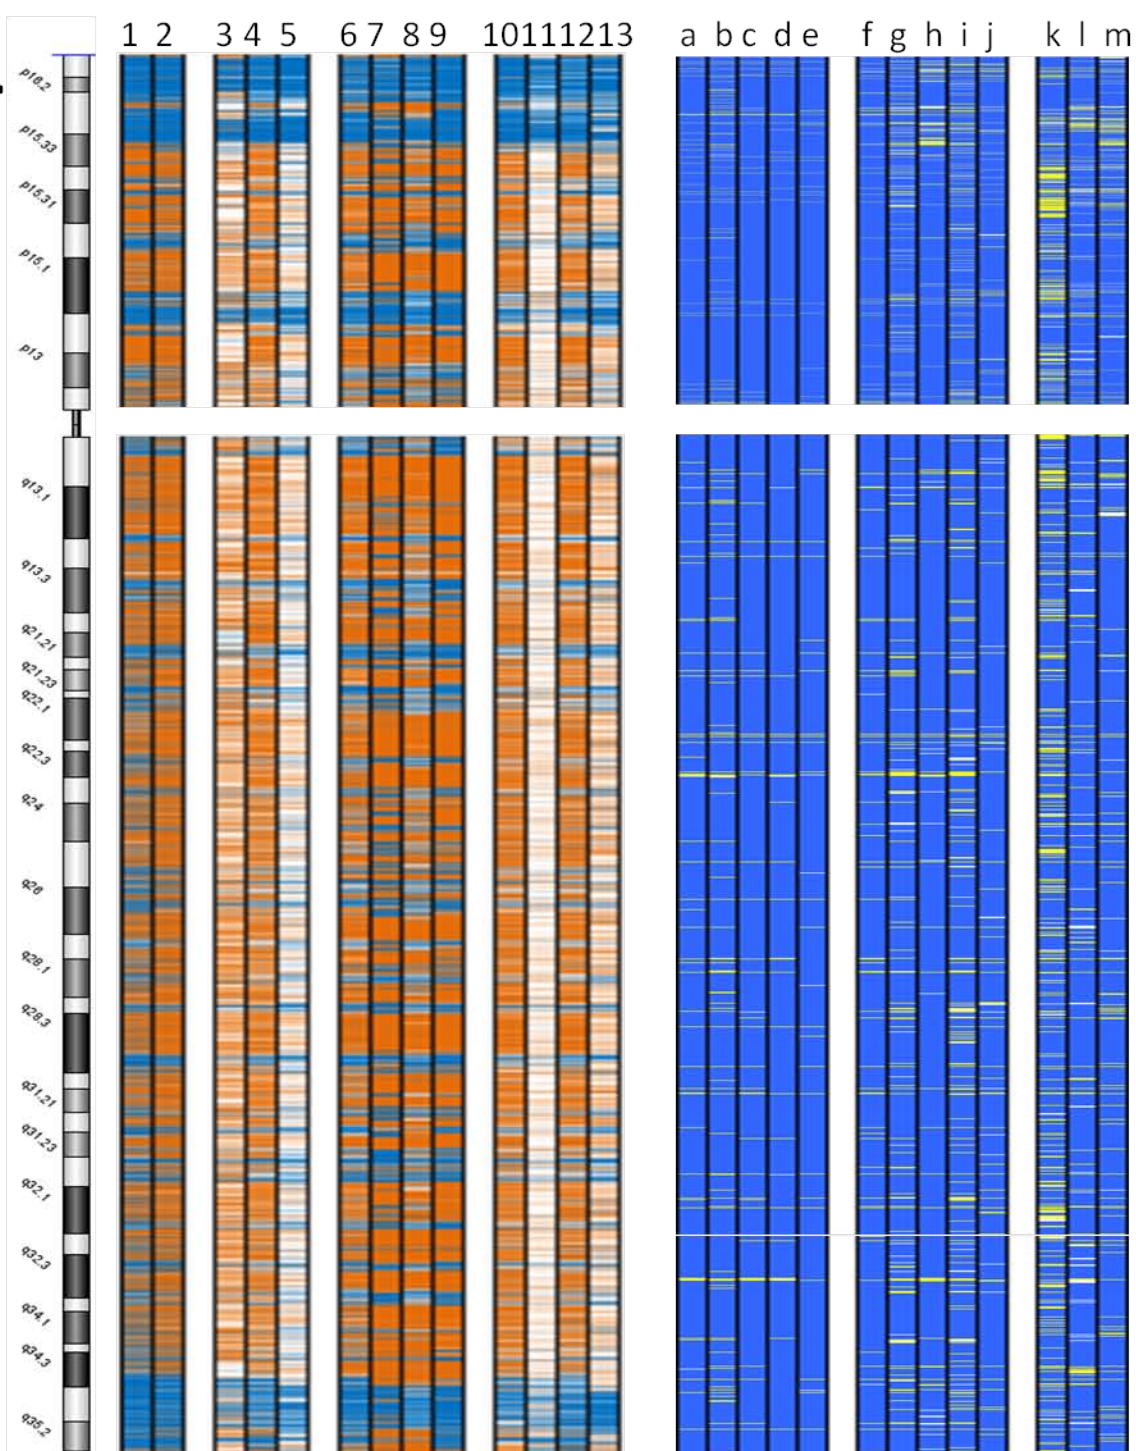

### McrBC method

- 1: FaDu HIF
- 2: Fadu
- 3: Malhavu
- 4: CL15
- 5: MDA-MB-231
- 6: MCF7
- 7: HepG2
- 8: huh7
- 9: CL10
- 10: breast tumor tissue
- 11: brain tumor tissue(no.RT619)
- 12: brain tumor tissue(no.t891)
- 13: brain tumor tissue(no.RT297)

### TspRI-ExoIII method

- a: brain normal tissue
- b: leukocyte normal tissue
- c: testis normal tissue
- d: liver normal tissue
- e: breast normal tissue
- f: breast tumor tissue (no. 146)
- g: breast tumor tissue (no. 125)
- h: breast tumor tissue (no. 93)
- i: breast tumor tissue (no. 89)
- j: brain tumor tissue (no. SIR)
- k: MCF7
- l: MDA-MB-231
- m: HeLa

5

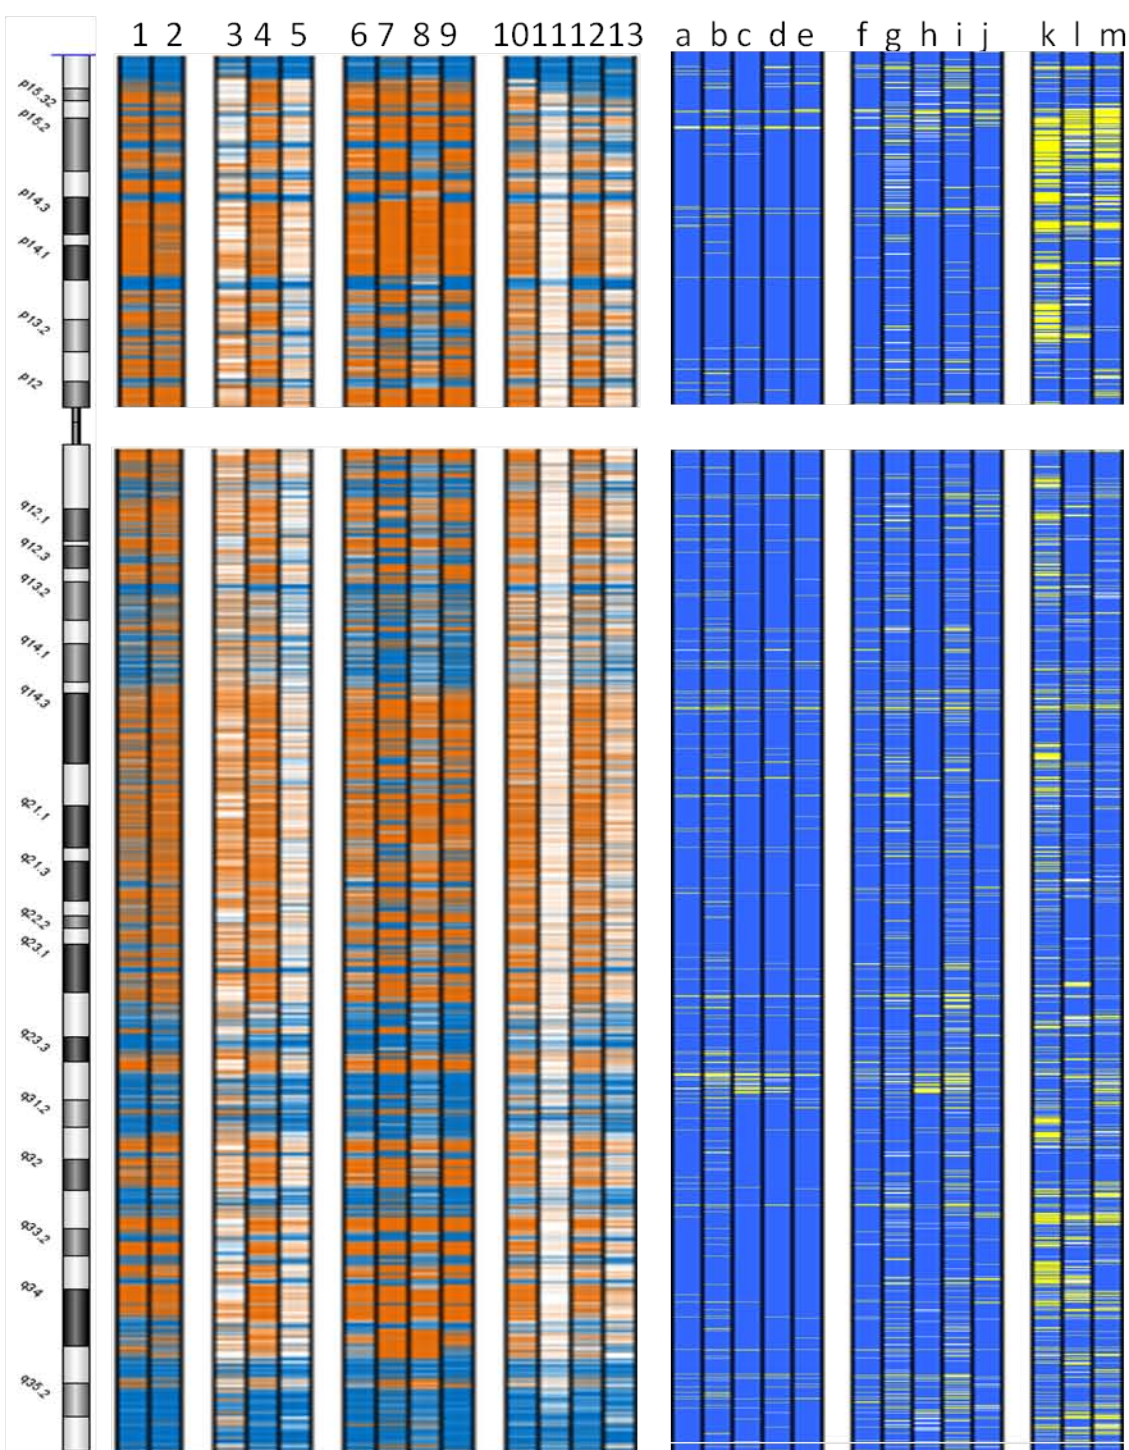

### McrBC method

- 1: FaDu HIF
- 2: Fadu
- 3: Malhavu
- 4: CL15
- 5: MDA-MB-231
- 6: MCF7
- 7: HepG2
- 8: huh7
- 9: CL10
- 10: breast tumor tissue
- 11: brain tumor tissue(no.RT619)
- 12: brain tumor tissue(no.t891)
- 13: brain tumor tissue(no.RT297)

### TspRI-ExoIII method

- a: brain normal tissue
- b: leukocyte normal tissue
- c: testis normal tissue
- d: liver normal tissue
- e: breast normal tissue
- f: breast tumor tissue (no. 146)
- g: breast tumor tissue (no. 125)
- h: breast tumor tissue (no. 93)
- i: breast tumor tissue (no. 89)
- j: brain tumor tissue (no. SIR)
- k: MCF7
- l: MDA-MB-231
- m: HeLa

6

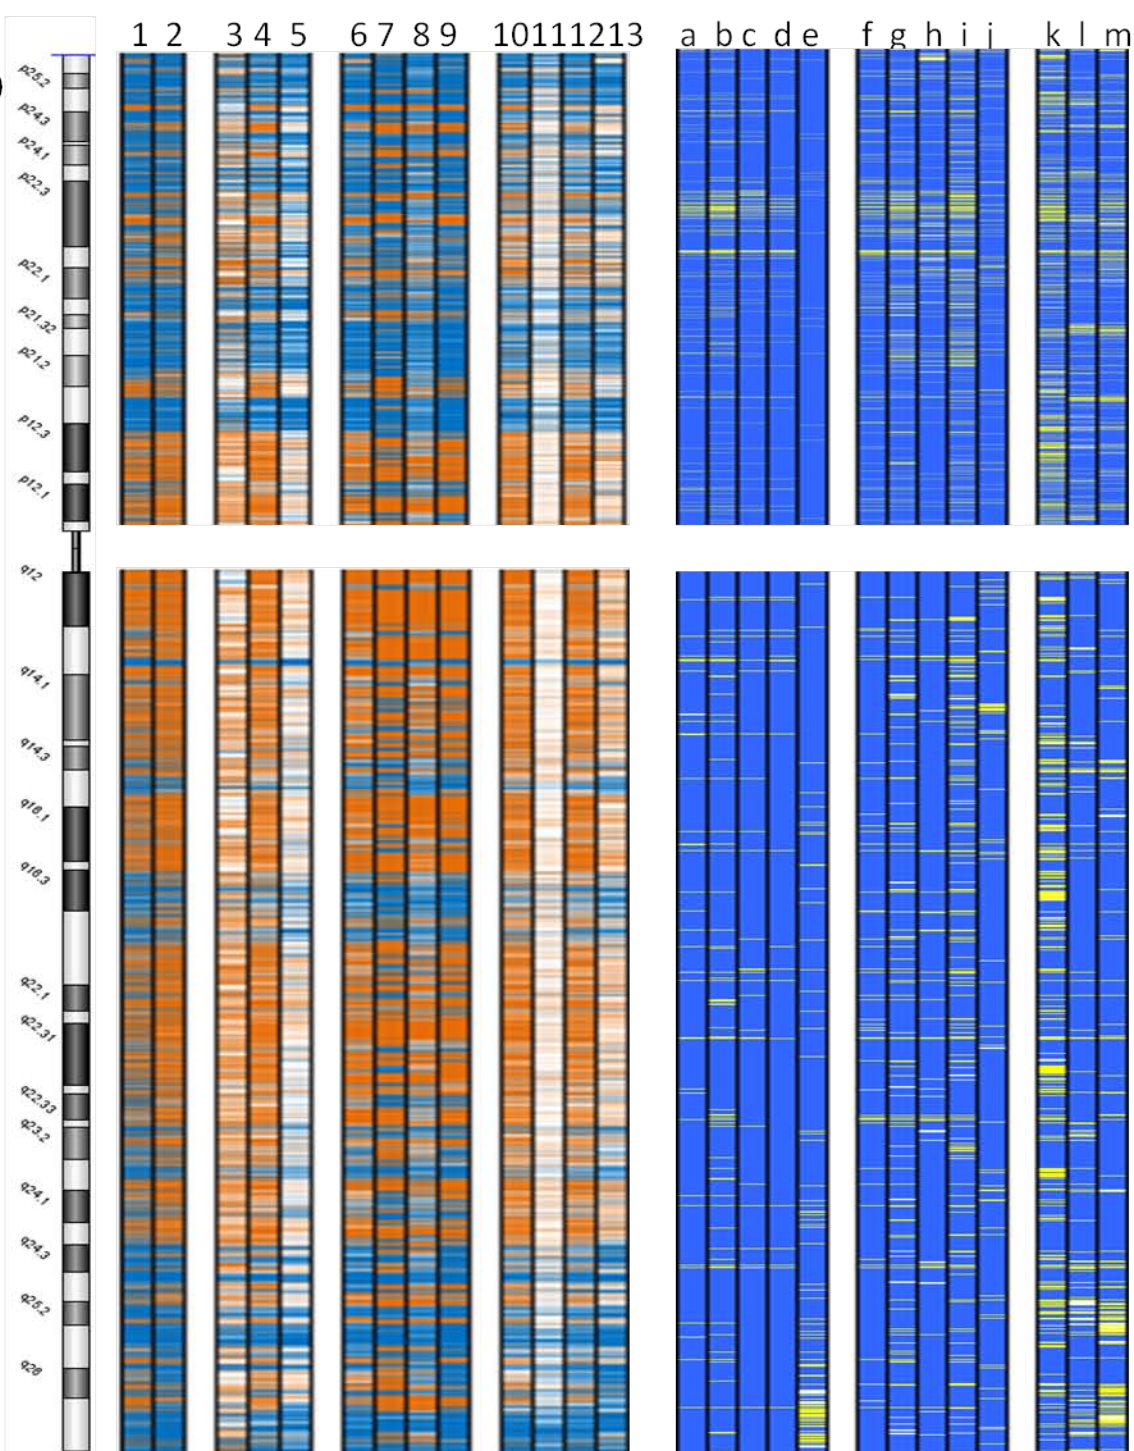

### McrBC method

- 1: FaDu HIF
- 2: Fadu
- 3: Malhavu
- 4: CL15
- 5: MDA-MB-231
- 6: MCF7
- 7: HepG2
- 8: huh7
- 9: CL10
- 10: breast tumor tissue
- 11: brain tumor tissue(no.RT619)
- 12: brain tumor tissue(no.t891)
- 13: brain tumor tissue(no.RT297)

### TspRI-ExoIII method

- a: brain normal tissue
- b: leukocyte normal tissue
- c: testis normal tissue
- d: liver normal tissue
- e: breast normal tissue
- f: breast tumor tissue (no. 146)
- g: breast tumor tissue (no. 125)
- h: breast tumor tissue (no. 93)
- i: breast tumor tissue (no. 89)
- j: brain tumor tissue (no. SIR)
- k: MCF7
- l: MDA-MB-231
- m: HeLa

7

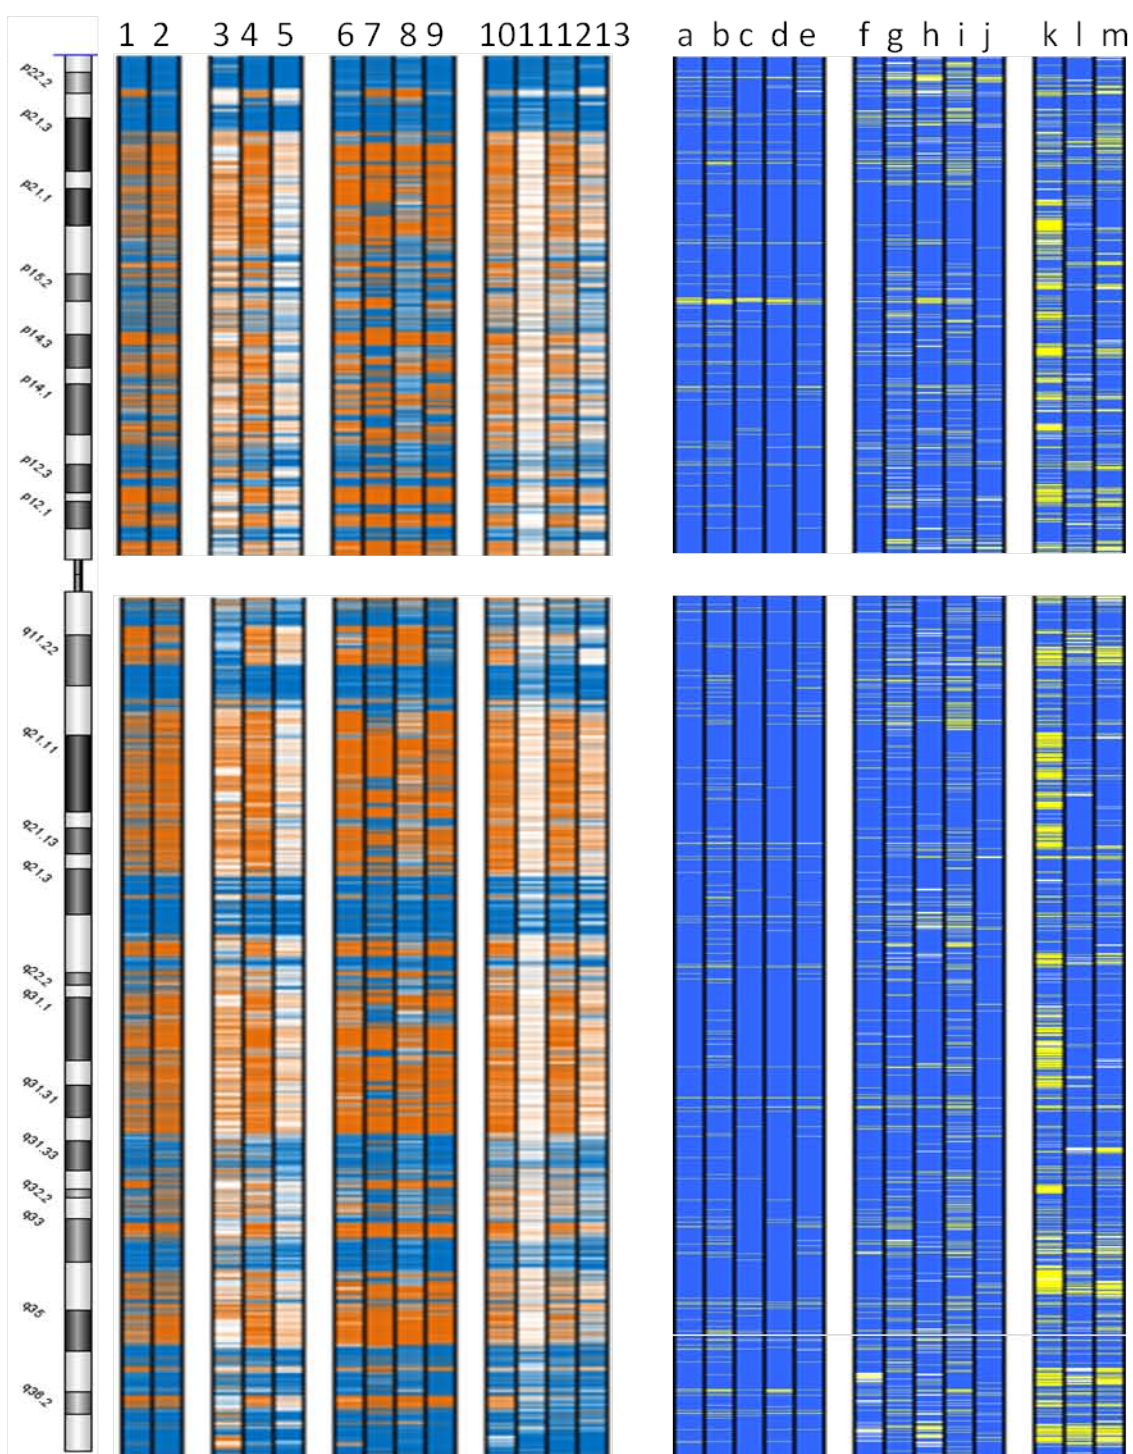

### McrBC method

- 1: FaDu HIF
- 2: Fadu
- 3: Malhavu
- 4: CL15
- 5: MDA-MB-231
- 6: MCF7
- 7: HepG2
- 8: huh7
- 9: CL10
- 10: breast tumor tissue
- 11: brain tumor tissue(no.RT619)
- 12: brain tumor tissue(no.t891)
- 13: brain tumor tissue(no.RT297)

### TspRI-ExoIII method

- a: brain normal tissue
- b: leukocyte normal tissue
- c: testis normal tissue
- d: liver normal tissue
- e: breast normal tissue
- f: breast tumor tissue (no. 146)
- g: breast tumor tissue (no. 125)
- h: breast tumor tissue (no. 93)
- i: breast tumor tissue (no. 89)
- j: brain tumor tissue (no. SIR)
- k: MCF7
- l: MDA-MB-231
- m: HeLa

8

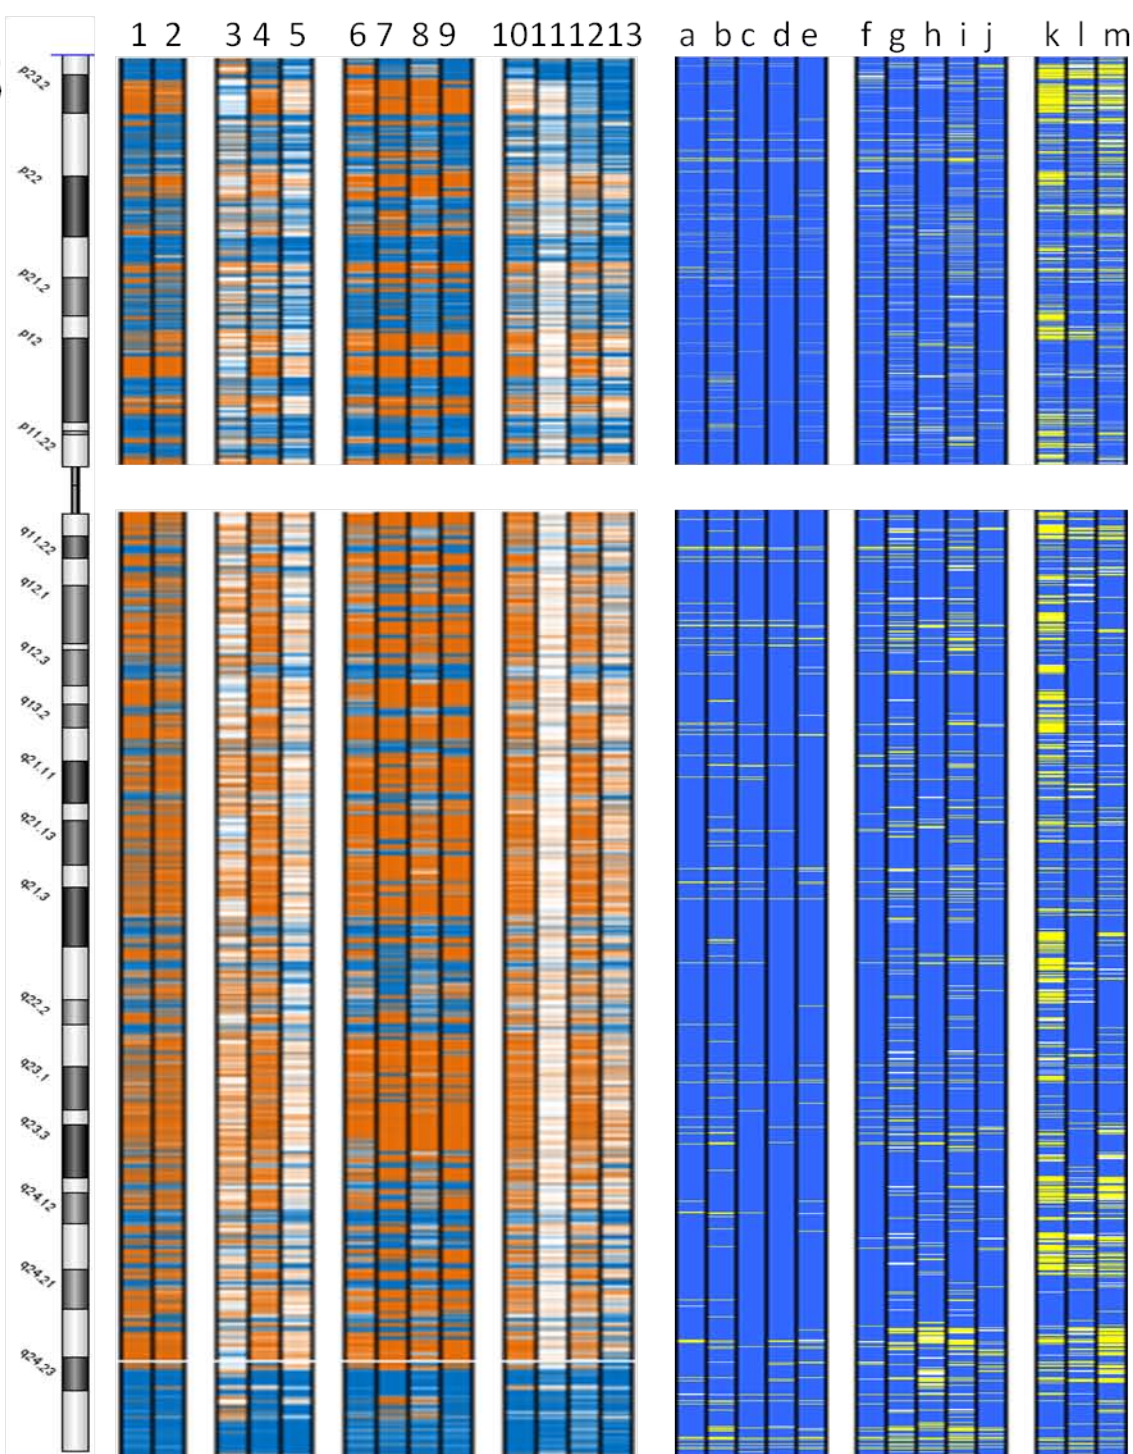

### McrBC method

- 1: FaDu HIF
- 2: Fadu
- 3: Malhavu
- 4: CL15
- 5: MDA-MB-231
- 6: MCF7
- 7: HepG2
- 8: huh7
- 9: CL10
- 10: breast tumor tissue
- 11: brain tumor tissue(no.RT619)
- 12: brain tumor tissue(no.t891)
- 13: brain tumor tissue(no.RT297)

### TspRI-ExoIII method

- a: brain normal tissue
- b: leukocyte normal tissue
- c: testis normal tissue
- d: liver normal tissue
- e: breast normal tissue
- f: breast tumor tissue (no. 146)
- g: breast tumor tissue (no. 125)
- h: breast tumor tissue (no. 93)
- i: breast tumor tissue (no. 89)
- j: brain tumor tissue (no. SIR)
- k: MCF7
- l: MDA-MB-231
- m: HeLa



9

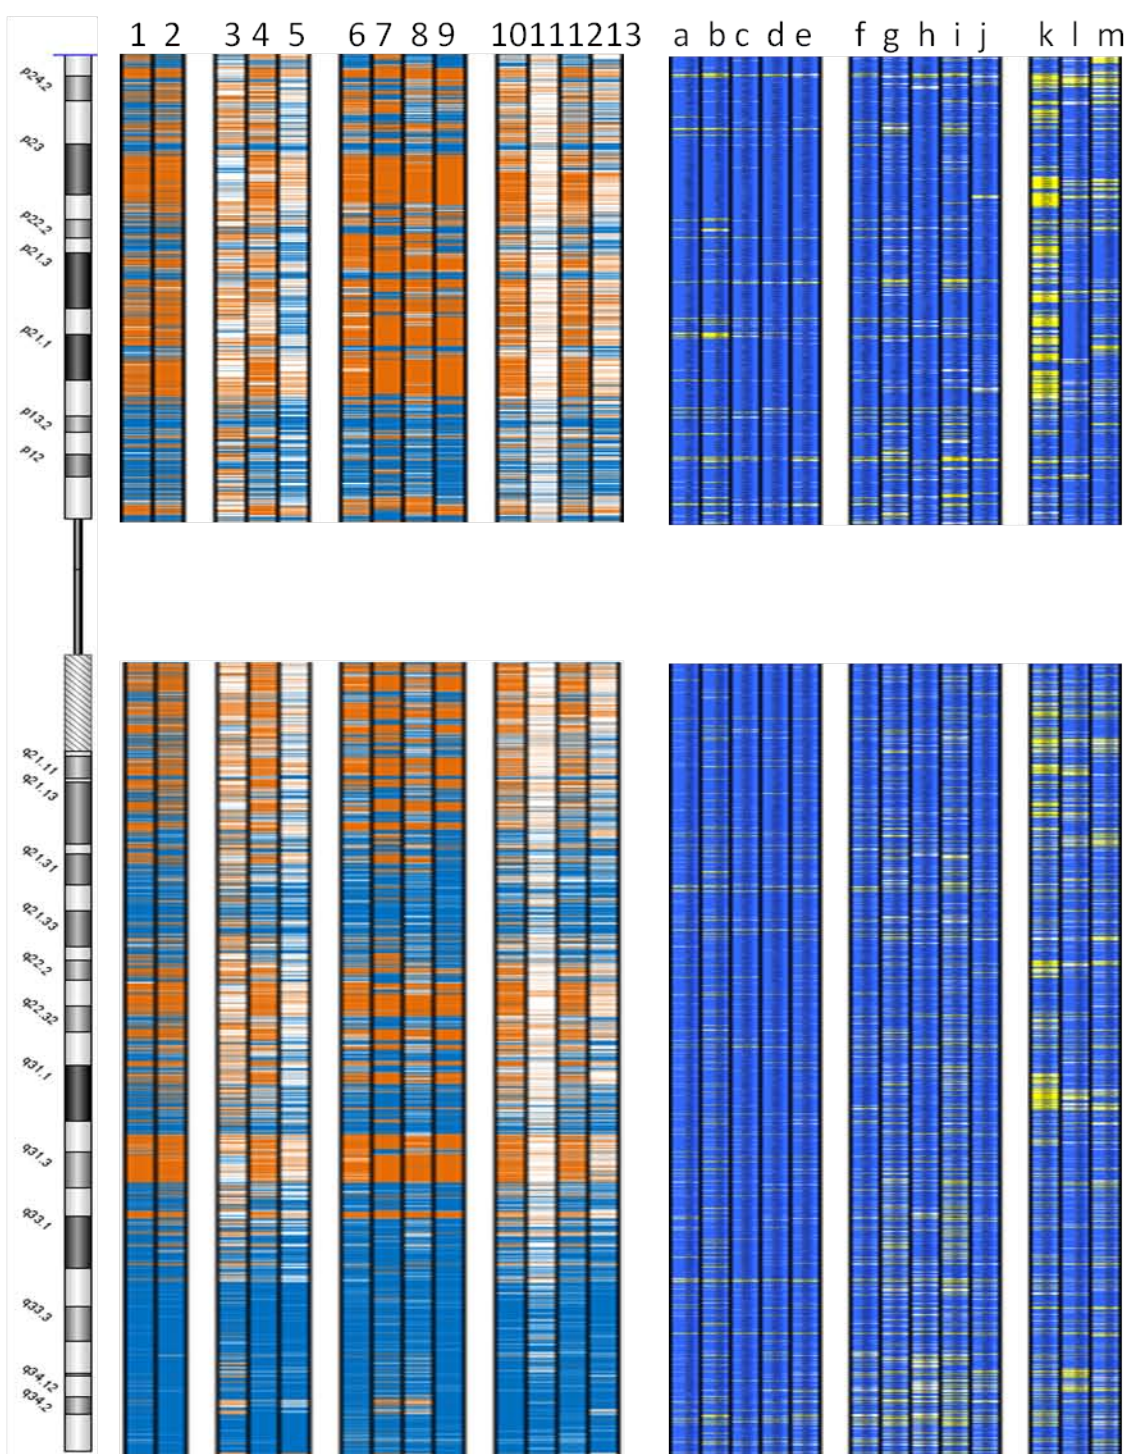

### McrBC method

- 1: FaDu HIF
- 2: Fadu
- 3: Malhavu
- 4: CL15
- 5: MDA-MB-231
- 6: MCF7
- 7: HepG2
- 8: huh7
- 9: CL10
- 10: breast tumor tissue
- 11: brain tumor tissue(no.RT619)
- 12: brain tumor tissue(no.t891)
- 13: brain tumor tissue(no.RT297)

### TspRI-ExoIII method

- a: brain normal tissue
- b: leukocyte normal tissue
- c: testis normal tissue
- d: liver normal tissue
- e: breast normal tissue
- f: breast tumor tissue (no. 146)
- g: breast tumor tissue (no. 125)
- h: breast tumor tissue (no. 93)
- i: breast tumor tissue (no. 89)
- j: brain tumor tissue (no. SIR)
- k: MCF7
- l: MDA-MB-231
- m: HeLa

10

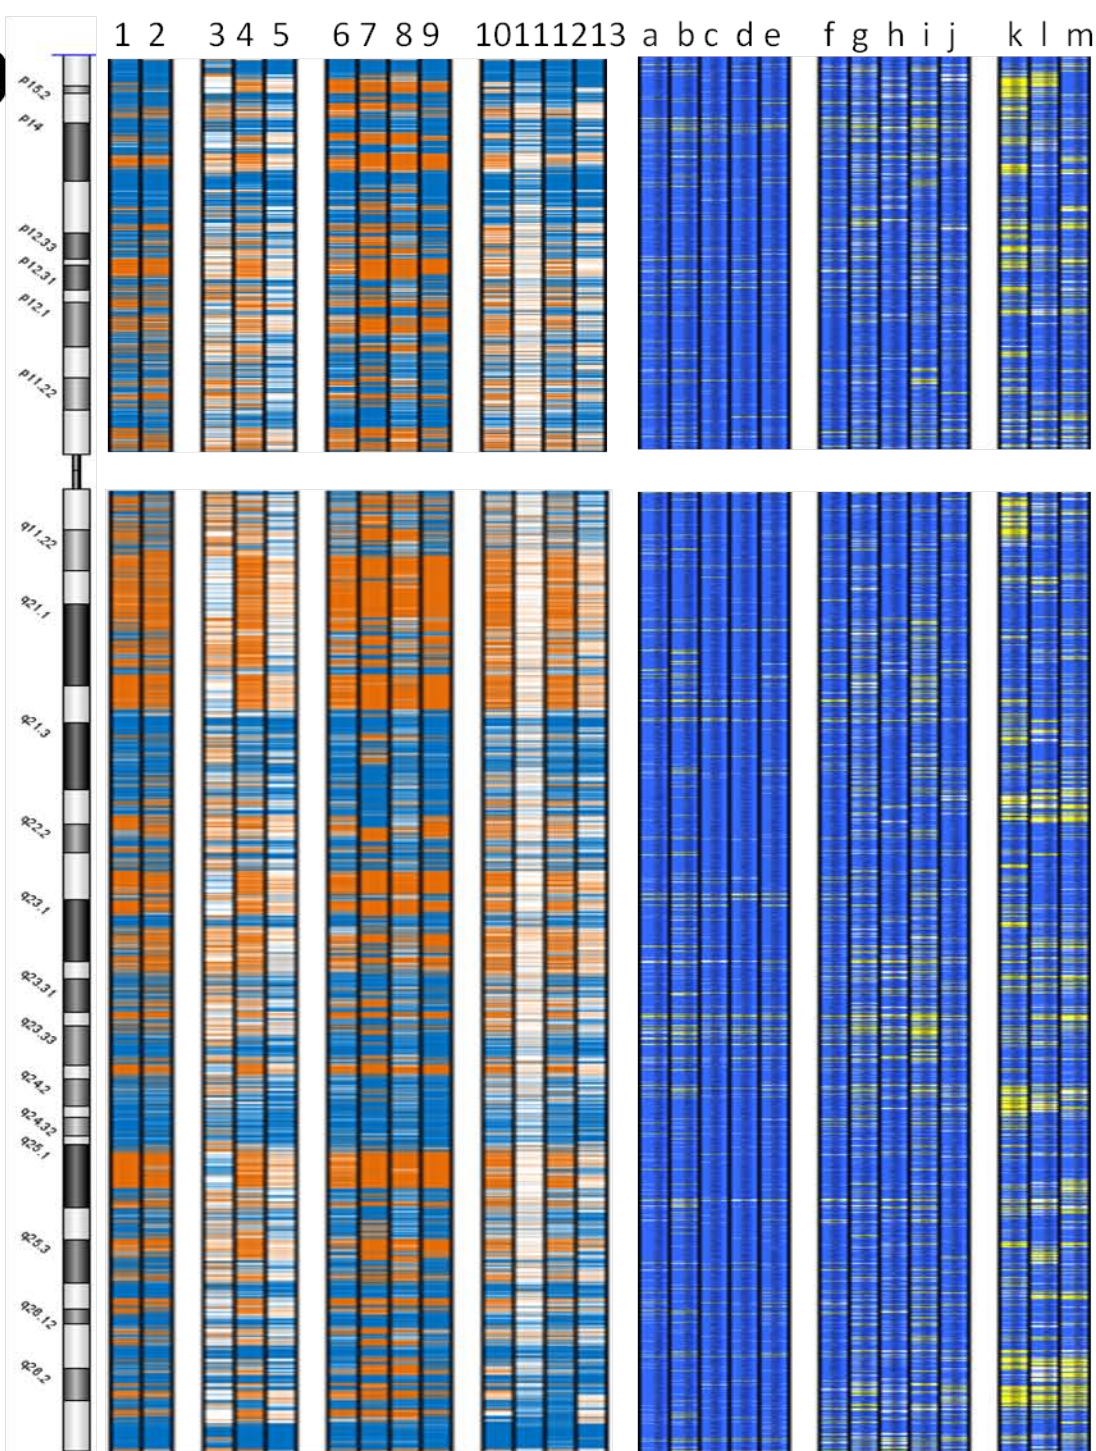

**McrBC method**

- 1: FaDu HIF
- 2: Fadu
- 3: Malhavu
- 4: CL15
- 5: MDA-MB-231
- 6: MCF7
- 7: HepG2
- 8: huh7
- 9: CL10
- 10: breast tumor tissue
- 11: brain tumor tissue(no.RT619)
- 12: brain tumor tissue(no.t891)
- 13: brain tumor tissue(no.RT297)

**TspRI-ExoIII method**

- a: brain normal tissue
- b: leukocyte normal tissue
- c: testis normal tissue
- d: liver normal tissue
- e: breast normal tissue
- f: breast tumor tissue (no. 146)
- g: breast tumor tissue (no. 125)
- h: breast tumor tissue (no. 93)
- i: breast tumor tissue (no. 89)
- j: brain tumor tissue (no. SIR)
- k: MCF7
- l: MDA-MB-231
- m: HeLa

# 11

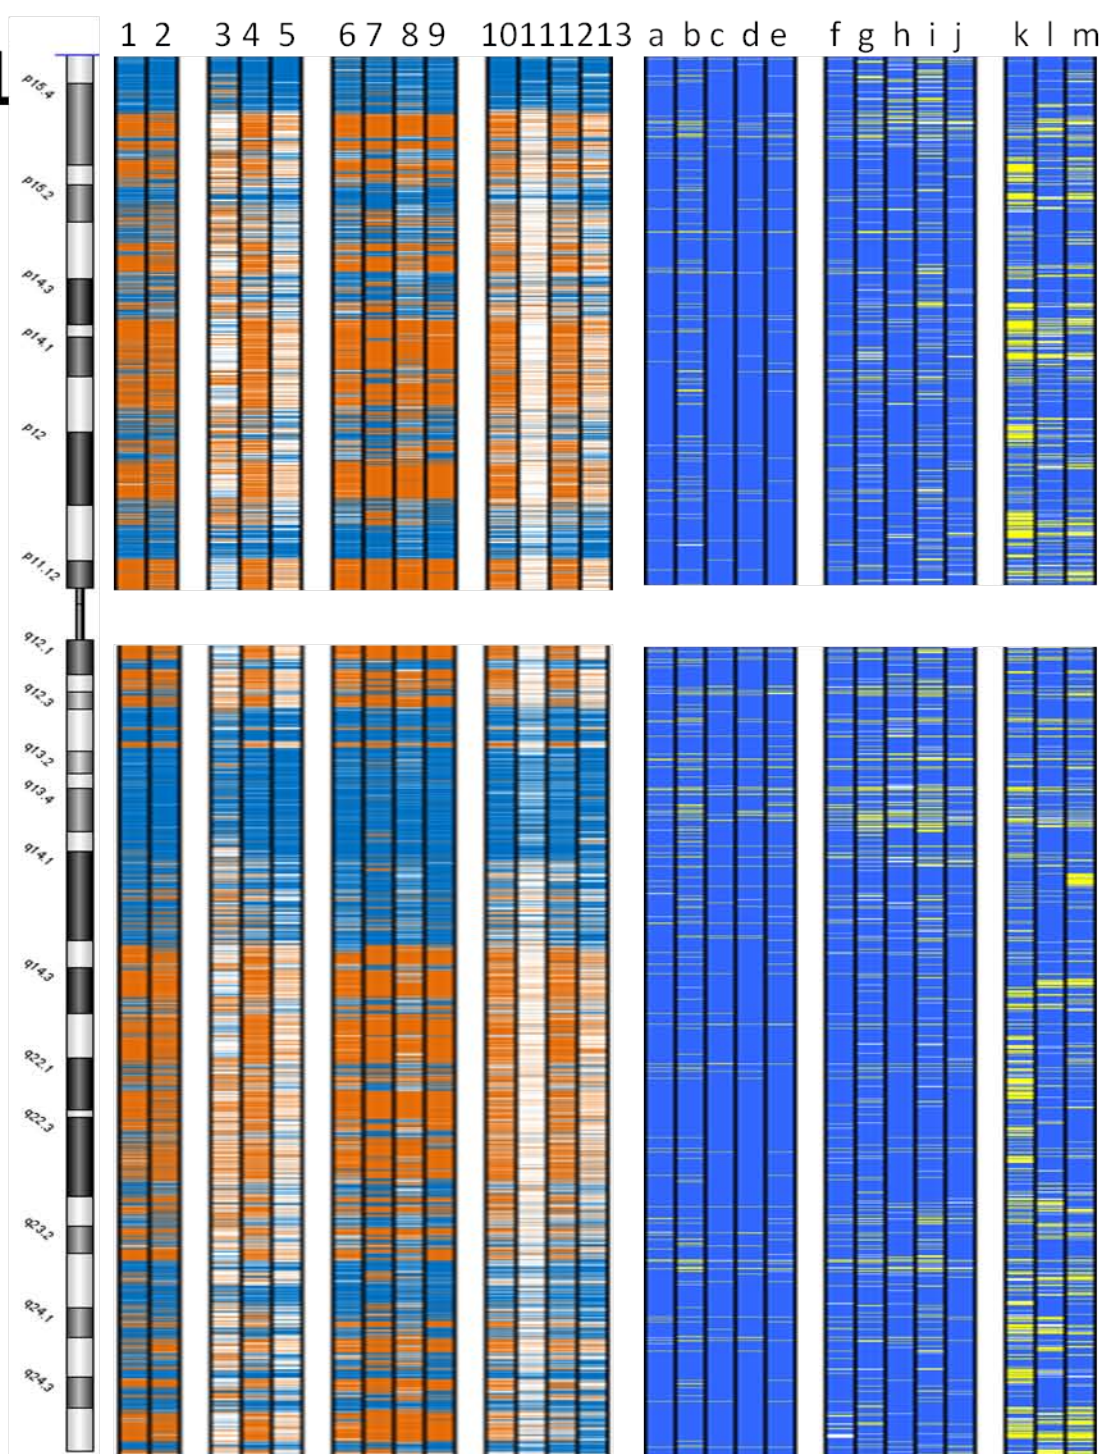

## McrBC method

- 1: FaDu HIF
- 2: Fadu
- 3: Malhavu
- 4: CL15
- 5: MDA-MB-231
- 6: MCF7
- 7: HepG2
- 8: huh7
- 9: CL10
- 10: breast tumor tissue
- 11: brain tumor tissue(no.RT619)
- 12: brain tumor tissue(no.t891)
- 13: brain tumor tissue(no.RT297)

## TspRI-ExoIII method

- a: brain normal tissue
- b: leukocyte normal tissue
- c: testis normal tissue
- d: liver normal tissue
- e: breast normal tissue
- f: breast tumor tissue (no. 146)
- g: breast tumor tissue (no. 125)
- h: breast tumor tissue (no. 93)
- i: breast tumor tissue (no. 89)
- j: brain tumor tissue (no. SIR)
- k: MCF7
- l: MDA-MB-231
- m: HeLa

# 12

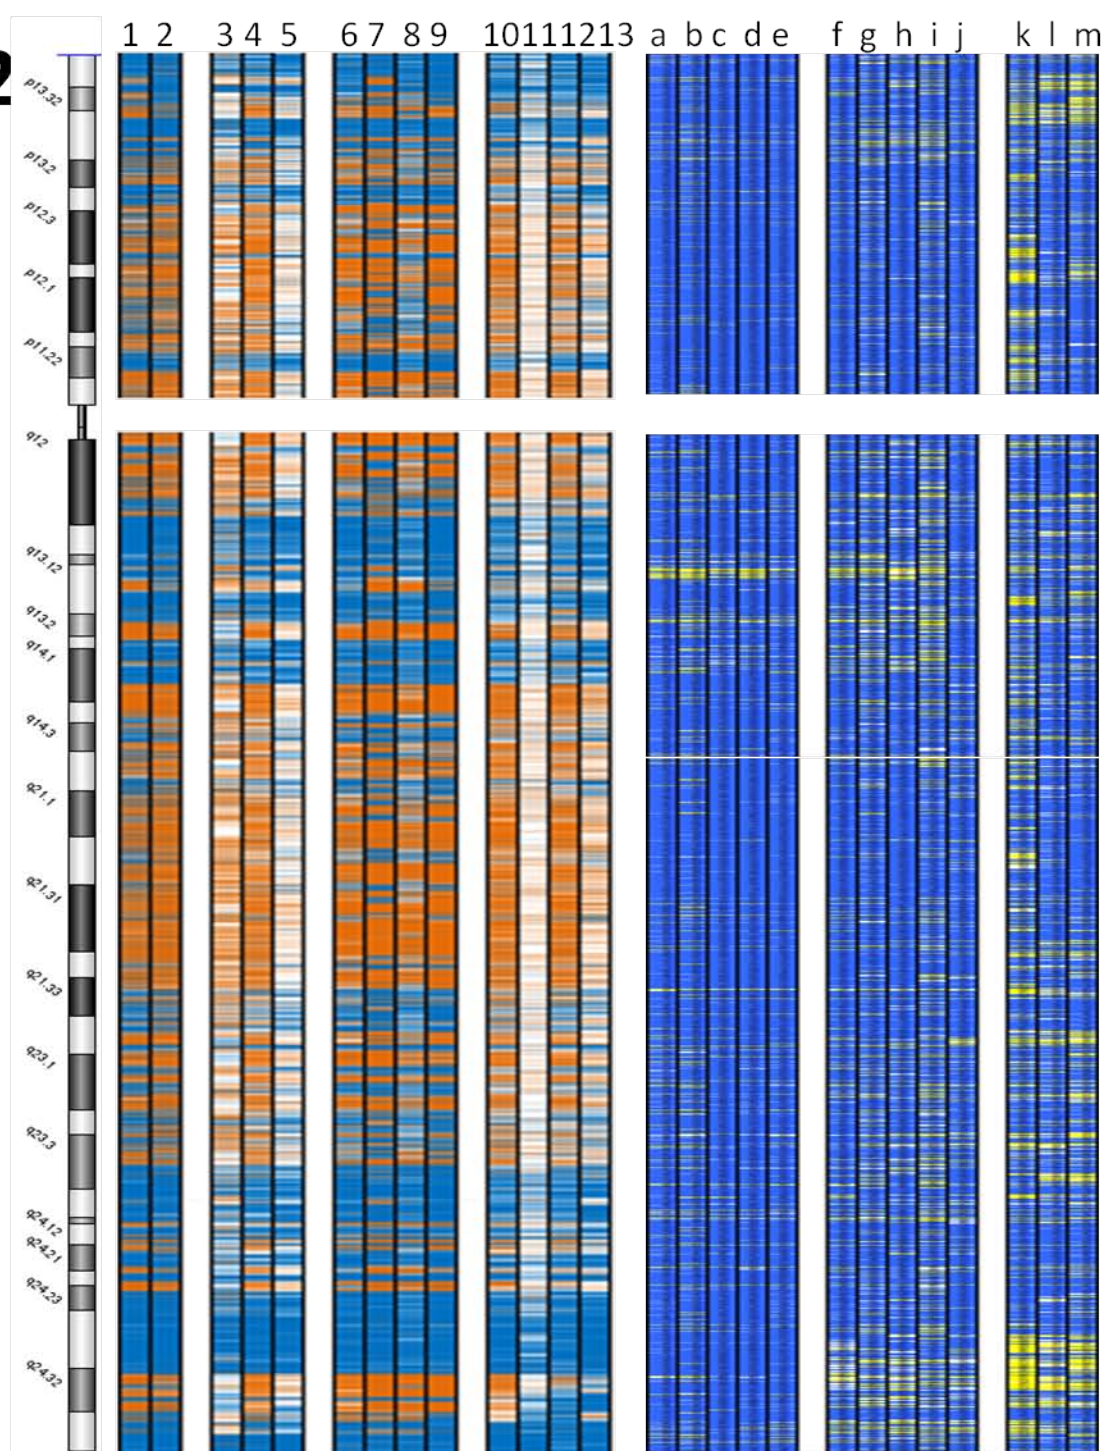

## McrBC method

- 1: FaDu HIF
- 2: Fadu
- 3: Malhavu
- 4: CL15
- 5: MDA-MB-231
- 6: MCF7
- 7: HepG2
- 8: huh7
- 9: CL10
- 10: breast tumor tissue
- 11: brain tumor tissue(no.RT619)
- 12: brain tumor tissue(no.t891)
- 13: brain tumor tissue(no.RT297)

## TspRI-ExoIII method

- a: brain normal tissue
- b: leukocyte normal tissue
- c: testis normal tissue
- d: liver normal tissue
- e: breast normal tissue
- f: breast tumor tissue (no. 146)
- g: breast tumor tissue (no. 125)
- h: breast tumor tissue (no. 93)
- i: breast tumor tissue (no. 89)
- j: brain tumor tissue (no. SIR)
- k: MCF7
- l: MDA-MB-231
- m: HeLa

# 13

1 2 3 4 5 6 7 8 9 10 11 12 13 a b c d e f g h i j k l m

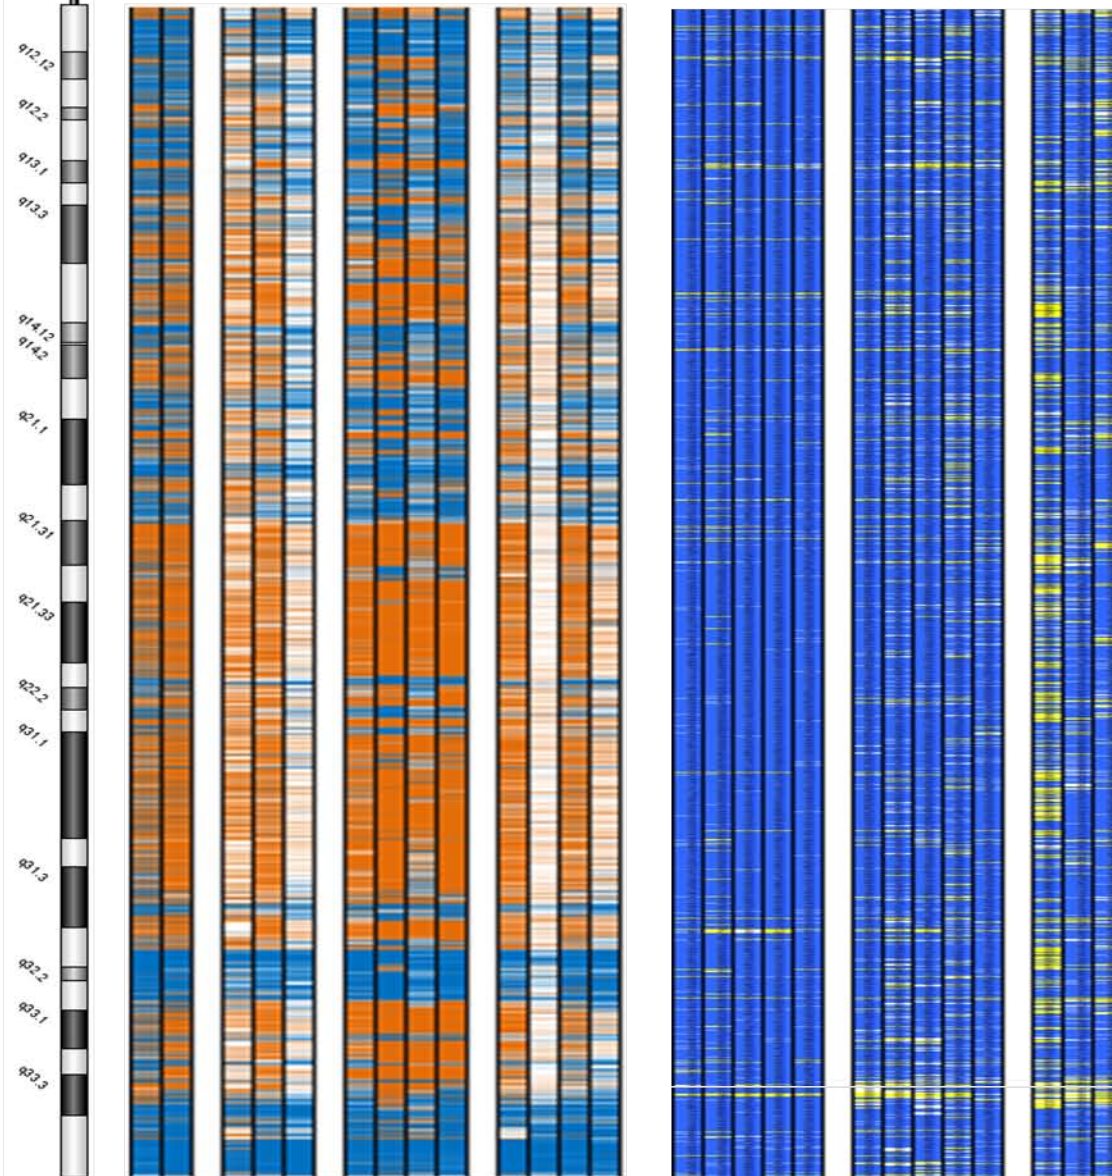

## McrBC method

- 1: FaDu HIF
- 2: Fadu
- 3: Malhavu
- 4: CL15
- 5: MDA-MB-231
- 6: MCF7
- 7: HepG2
- 8: huh7
- 9: CL10
- 10: breast tumor tissue
- 11: brain tumor tissue(no.RT619)
- 12: brain tumor tissue(no.t891)
- 13: brain tumor tissue(no.RT297)

## TspRI-ExoIII method

- a: brain normal tissue
- b: leukocyte normal tissue
- c: testis normal tissue
- d: liver normal tissue
- e: breast normal tissue
- f: breast tumor tissue (no. 146)
- g: breast tumor tissue (no. 125)
- h: breast tumor tissue (no. 93)
- i: breast tumor tissue (no. 89)
- j: brain tumor tissue (no. SIR)
- k: MCF7
- l: MDA-MB-231
- m: HeLa

# 14

1 2 3 4 5 6 7 8 9 10 11 12 13 a b c d e f g h i j k l m

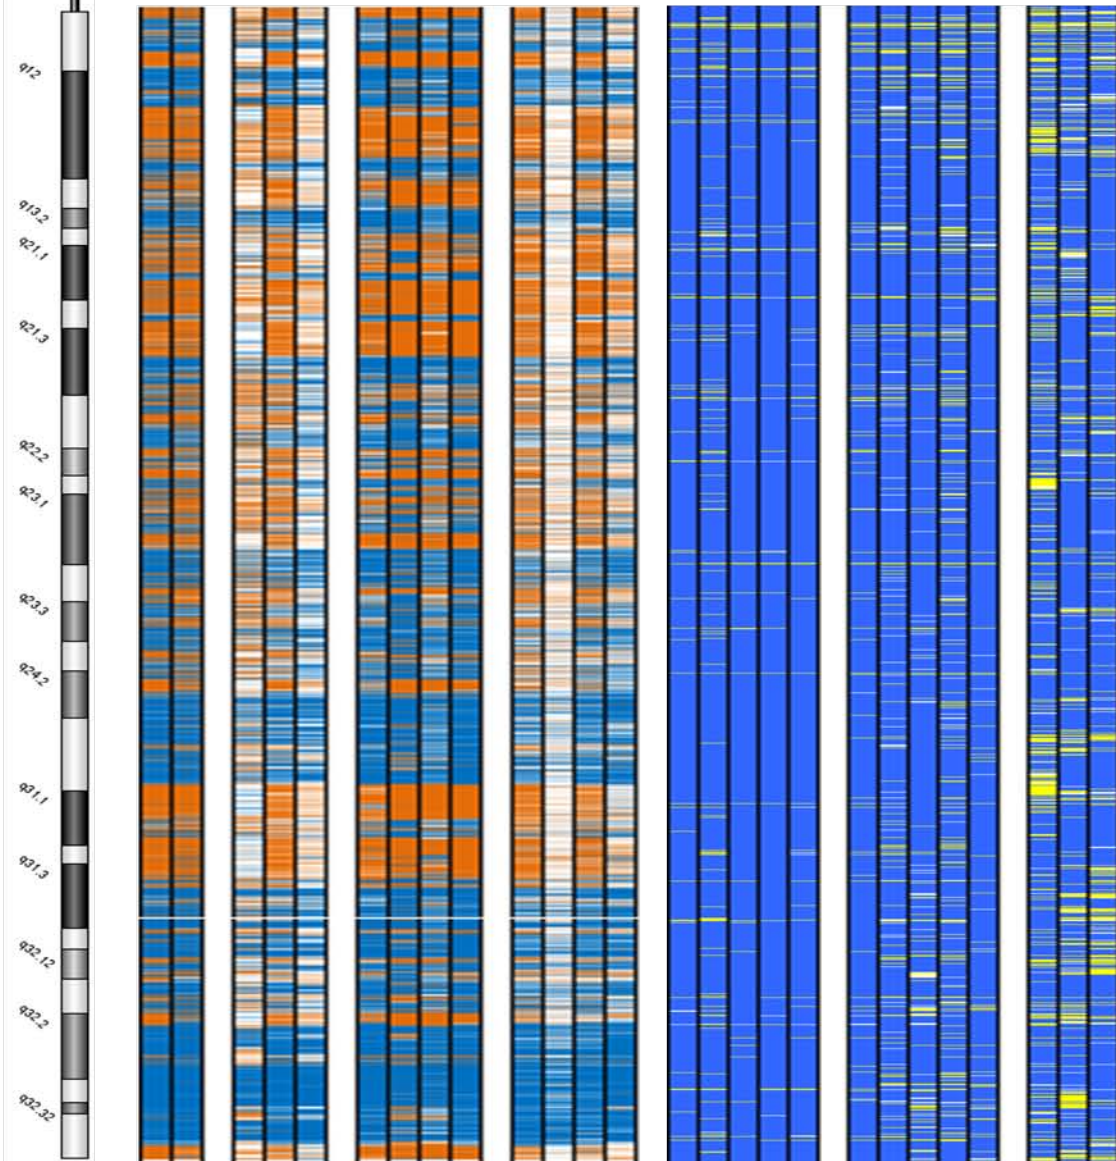

### McrBC method

- 1: FaDu HIF
- 2: Fadu
- 3: Malhavu
- 4: CL15
- 5: MDA-MB-231
- 6: MCF7
- 7: HepG2
- 8: huh7
- 9: CL10
- 10: breast tumor tissue
- 11: brain tumor tissue(no.RT619)
- 12: brain tumor tissue(no.t891)
- 13: brain tumor tissue(no.RT297)

### TspRI-ExoIII method

- a: brain normal tissue
- b: leukocyte normal tissue
- c: testis normal tissue
- d: liver normal tissue
- e: breast normal tissue
- f: breast tumor tissue (no. 146)
- g: breast tumor tissue (no. 125)
- h: breast tumor tissue (no. 93)
- i: breast tumor tissue (no. 89)
- j: brain tumor tissue (no. SIR)
- k: MCF7
- l: MDA-MB-231
- m: HeLa

# 15

1 2 3 4 5 6 7 8 9 10 11 12 13 a b c d e f g h i j k l m

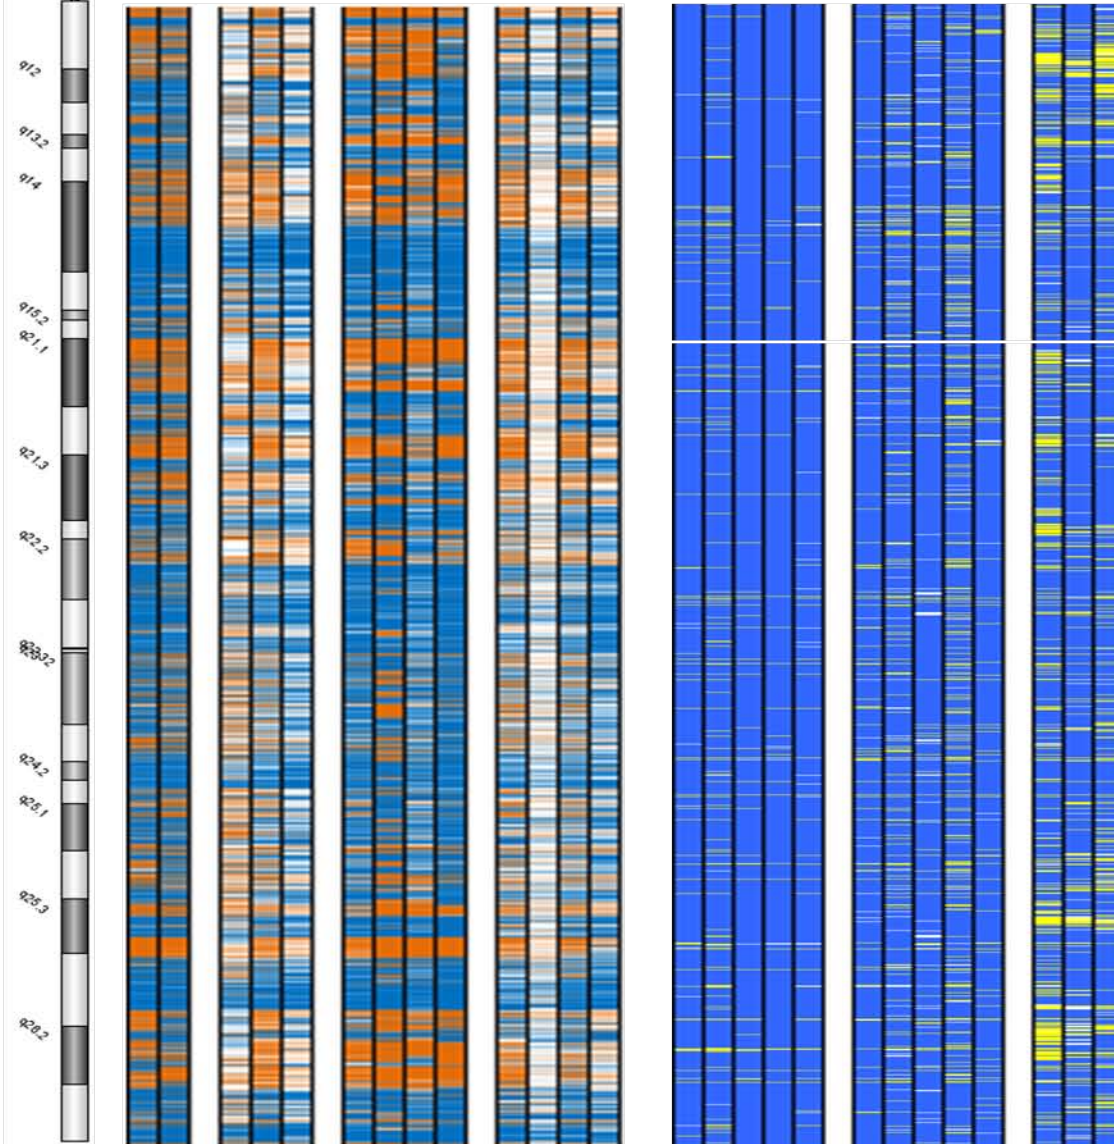

## McrBC method

- 1: FaDu HIF
- 2: Fadu
- 3: Malhavu
- 4: CL15
- 5: MDA-MB-231
- 6: MCF7
- 7: HepG2
- 8: huh7
- 9: CL10
- 10: breast tumor tissue
- 11: brain tumor tissue(no.RT619)
- 12: brain tumor tissue(no.t891)
- 13: brain tumor tissue(no.RT297)

## TspRI-ExoIII method

- a: brain normal tissue
- b: leukocyte normal tissue
- c: testis normal tissue
- d: liver normal tissue
- e: breast normal tissue
- f: breast tumor tissue (no. 146)
- g: breast tumor tissue (no. 125)
- h: breast tumor tissue (no. 93)
- i: breast tumor tissue (no. 89)
- j: brain tumor tissue (no. SIR)
- k: MCF7
- l: MDA-MB-231
- m: HeLa

16

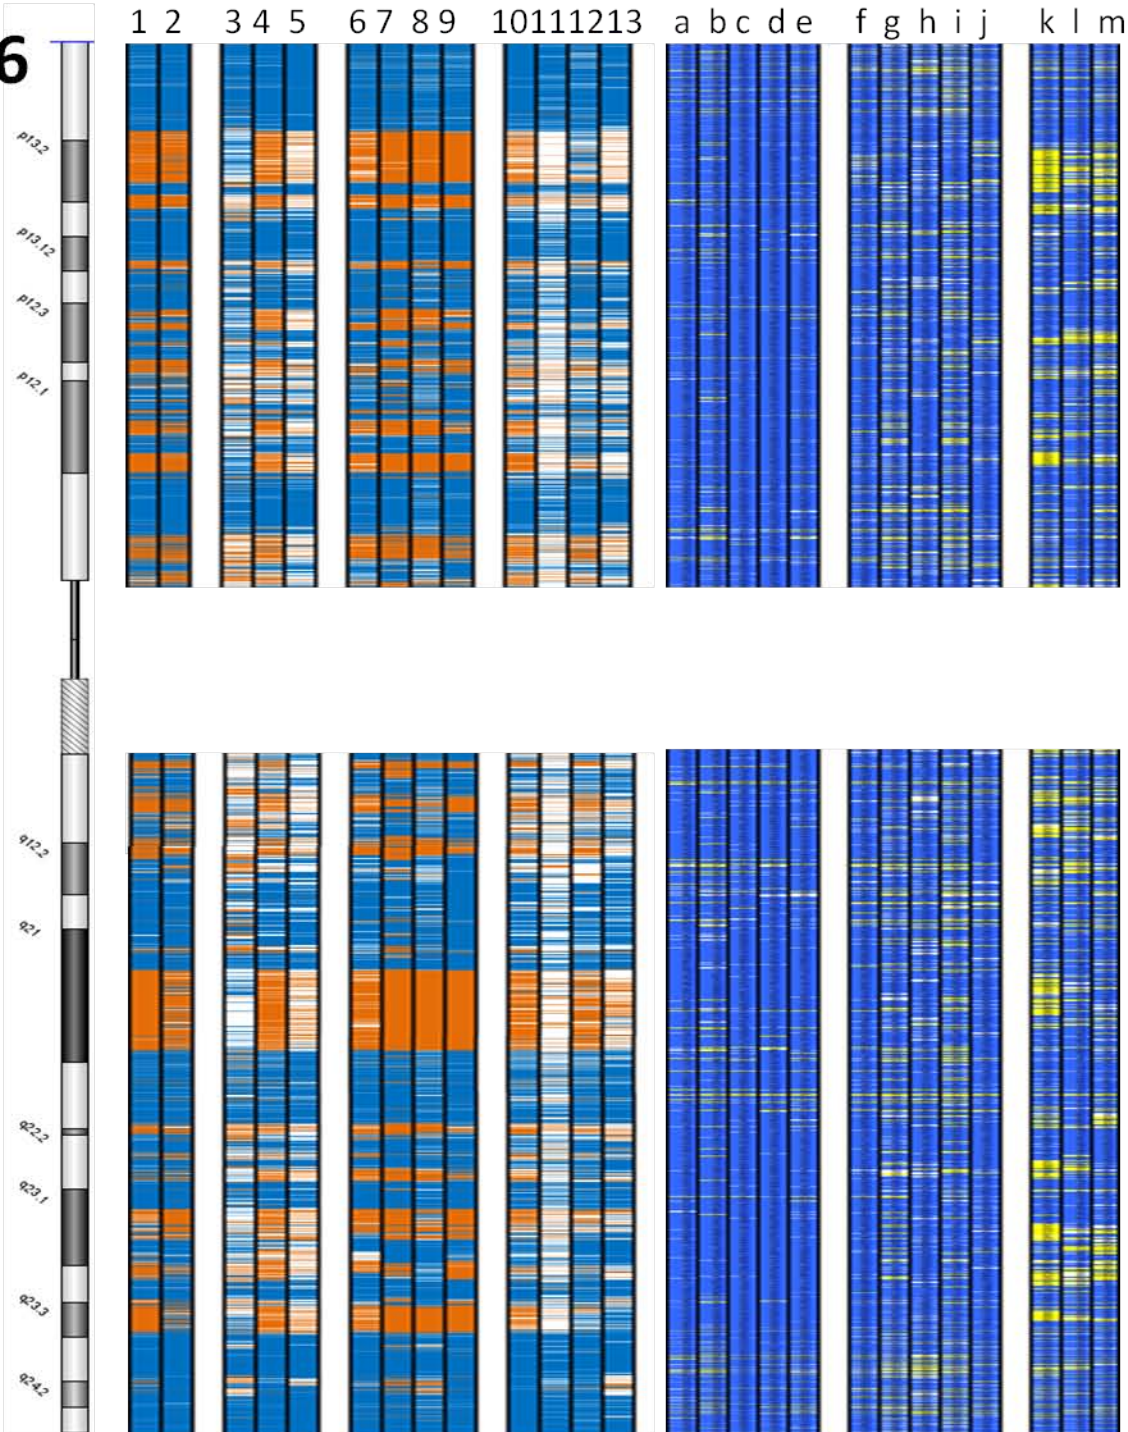

### McrBC method

- 1: FaDu HIF
- 2: Fadu
- 3: Malhavu
- 4: CL15
- 5: MDA-MB-231
- 6: MCF7
- 7: HepG2
- 8: huh7
- 9: CL10
- 10: breast tumor tissue
- 11: brain tumor tissue(no.RT619)
- 12: brain tumor tissue(no.t891)
- 13: brain tumor tissue(no.RT297)

### TspRI-ExoIII method

- a: brain normal tissue
- b: leukocyte normal tissue
- c: testis normal tissue
- d: liver normal tissue
- e: breast normal tissue
- f: breast tumor tissue (no. 146)
- g: breast tumor tissue (no. 125)
- h: breast tumor tissue (no. 93)
- i: breast tumor tissue (no. 89)
- j: brain tumor tissue (no. SIR)
- k: MCF7
- l: MDA-MB-231
- m: HeLa



# 17

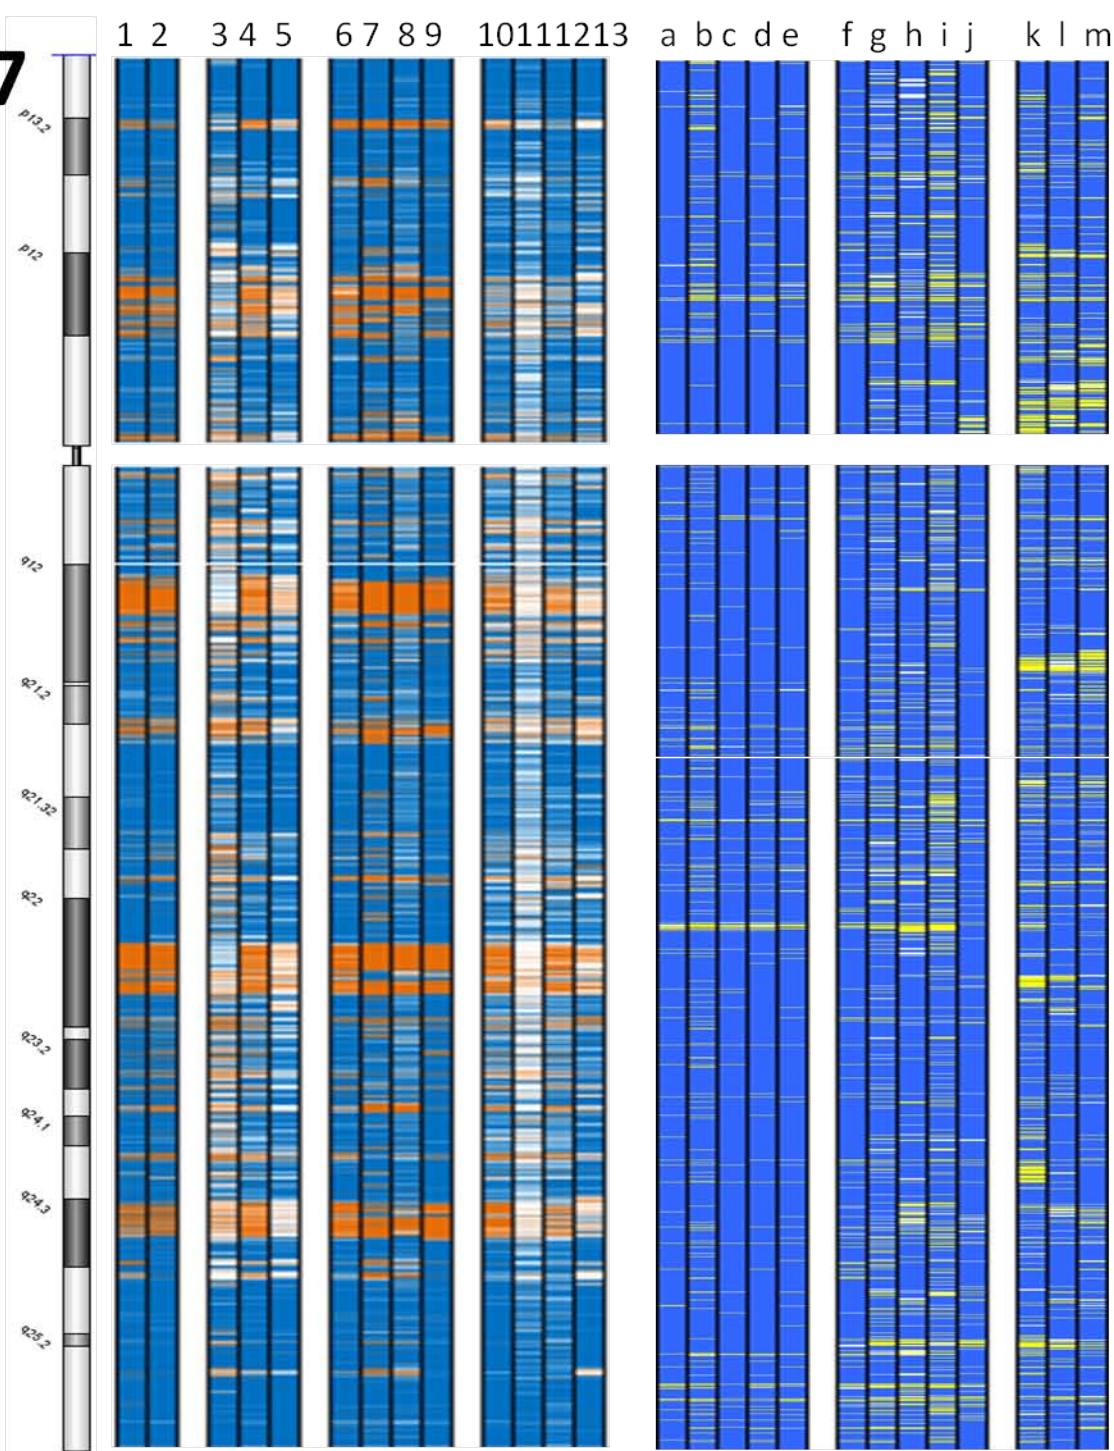

## McrBC method

- 1: FaDu HIF
- 2: Fadu
- 3: Malhavu
- 4: CL15
- 5: MDA-MB-231
- 6: MCF7
- 7: HepG2
- 8: huh7
- 9: CL10
- 10: breast tumor tissue
- 11: brain tumor tissue(no.RT619)
- 12: brain tumor tissue(no.t891)
- 13: brain tumor tissue(no.RT297)

## TspRI-ExoIII method

- a: brain normal tissue
- b: leukocyte normal tissue
- c: testis normal tissue
- d: liver normal tissue
- e: breast normal tissue
- f: breast tumor tissue (no. 146)
- g: breast tumor tissue (no. 125)
- h: breast tumor tissue (no. 93)
- i: breast tumor tissue (no. 89)
- j: brain tumor tissue (no. SIR)
- k: MCF7
- l: MDA-MB-231
- m: HeLa

# 18

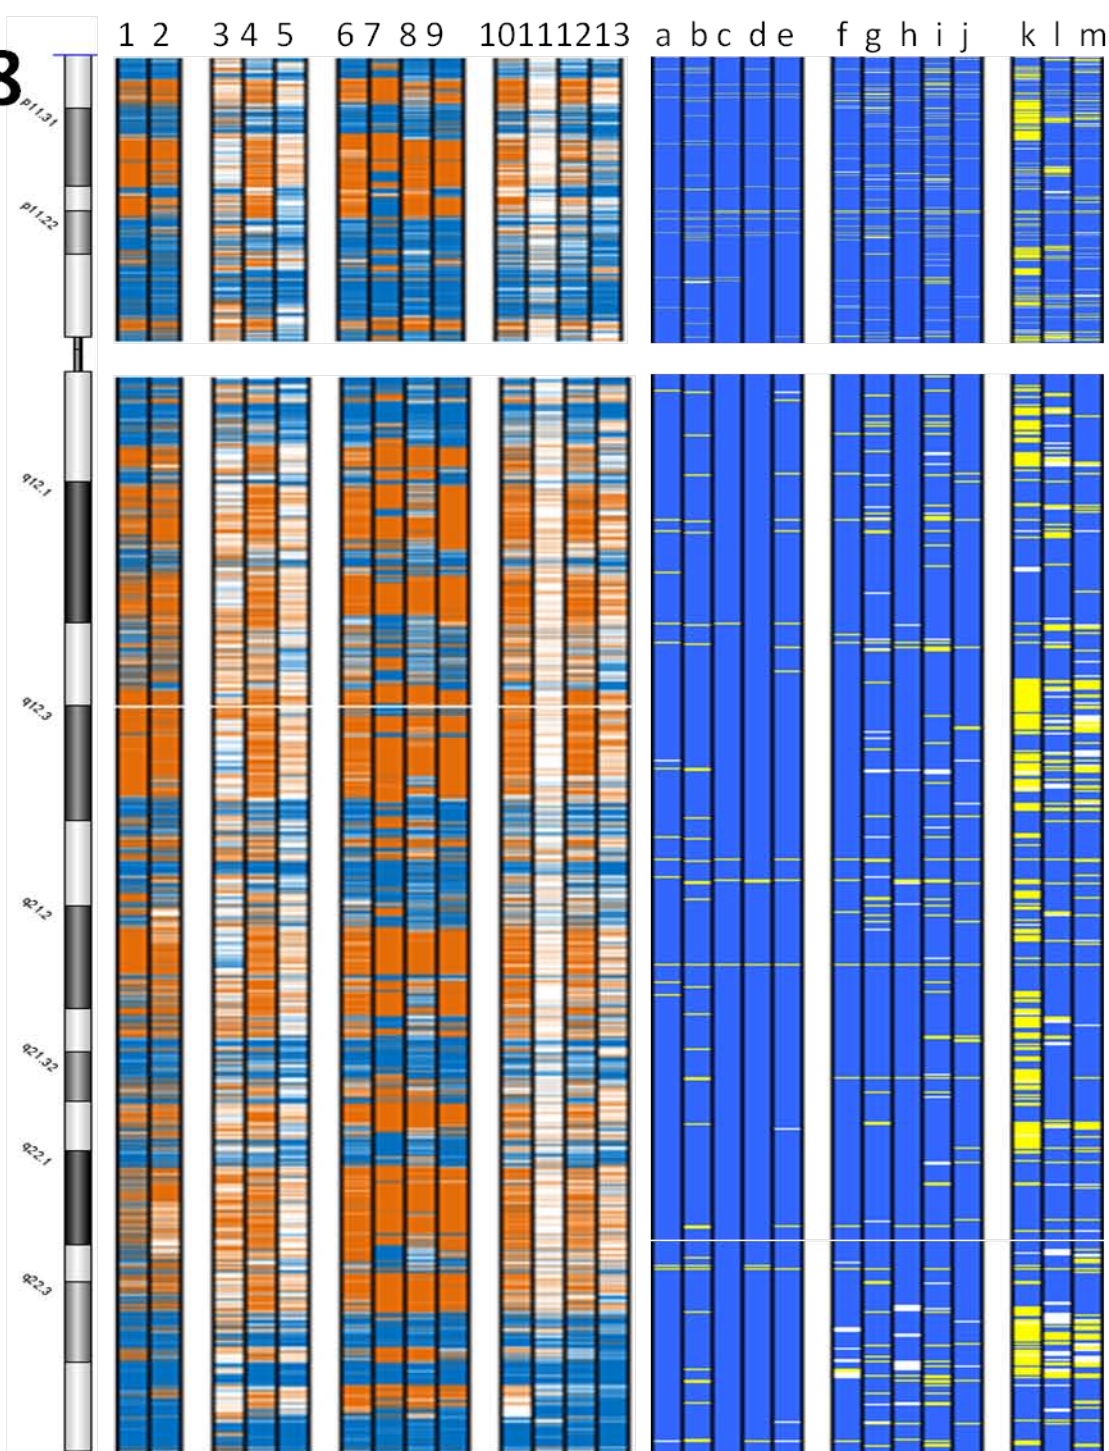

## McrBC method

- 1: FaDu HIF
- 2: Fadu
- 3: Malhavu
- 4: CL15
- 5: MDA-MB-231
- 6: MCF7
- 7: HepG2
- 8: huh7
- 9: CL10
- 10: breast tumor tissue
- 11: brain tumor tissue(no.RT619)
- 12: brain tumor tissue(no.t891)
- 13: brain tumor tissue(no.RT297)

## TspRI-ExoIII method

- a: brain normal tissue
- b: leukocyte normal tissue
- c: testis normal tissue
- d: liver normal tissue
- e: breast normal tissue
- f: breast tumor tissue (no. 146)
- g: breast tumor tissue (no. 125)
- h: breast tumor tissue (no. 93)
- i: breast tumor tissue (no. 89)
- j: brain tumor tissue (no. SIR)
- k: MCF7
- l: MDA-MB-231
- m: HeLa

19

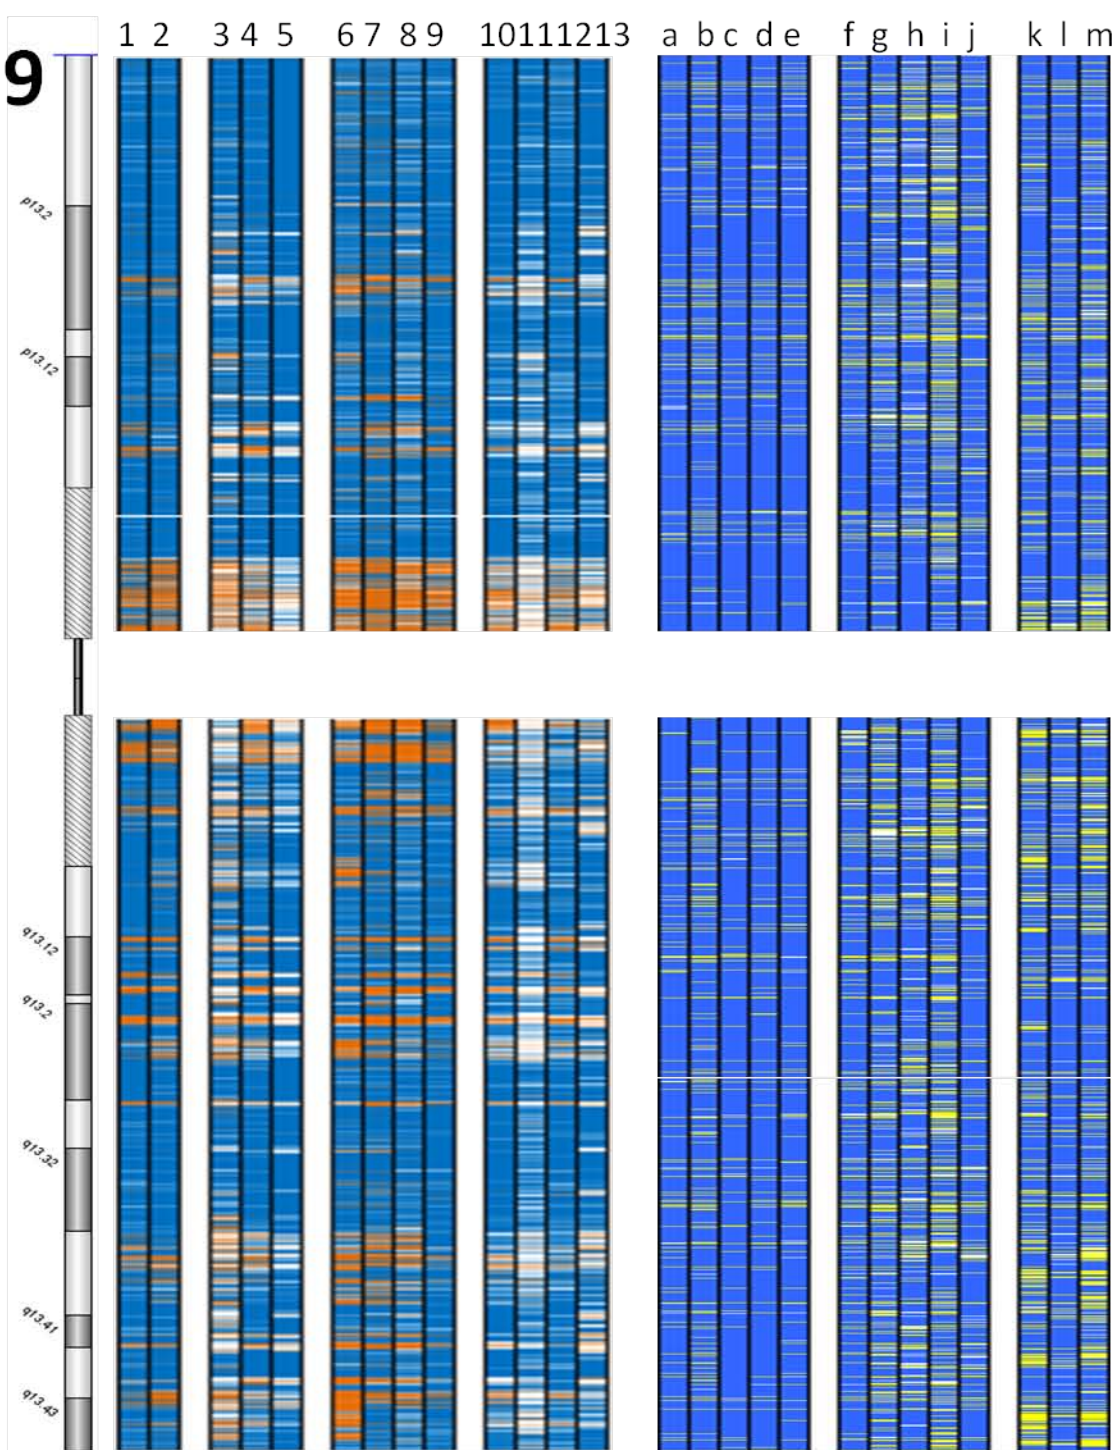

### McrBC method

- 1: FaDu HIF
- 2: Fadu
- 3: Malhavu
- 4: CL15
- 5: MDA-MB-231
- 6: MCF7
- 7: HepG2
- 8: huh7
- 9: CL10
- 10: breast tumor tissue
- 11: brain tumor tissue(no.RT619)
- 12: brain tumor tissue(no.t891)
- 13: brain tumor tissue(no.RT297)

### TspRI-ExoIII method

- a: brain normal tissue
- b: leukocyte normal tissue
- c: testis normal tissue
- d: liver normal tissue
- e: breast normal tissue
- f: breast tumor tissue (no. 146)
- g: breast tumor tissue (no. 125)
- h: breast tumor tissue (no. 93)
- i: breast tumor tissue (no. 89)
- j: brain tumor tissue (no. SIR)
- k: MCF7
- l: MDA-MB-231
- m: HeLa

20

1 2 3 4 5 6 7 8 9 10 11 12 13

a b c d e f g h i j k l m

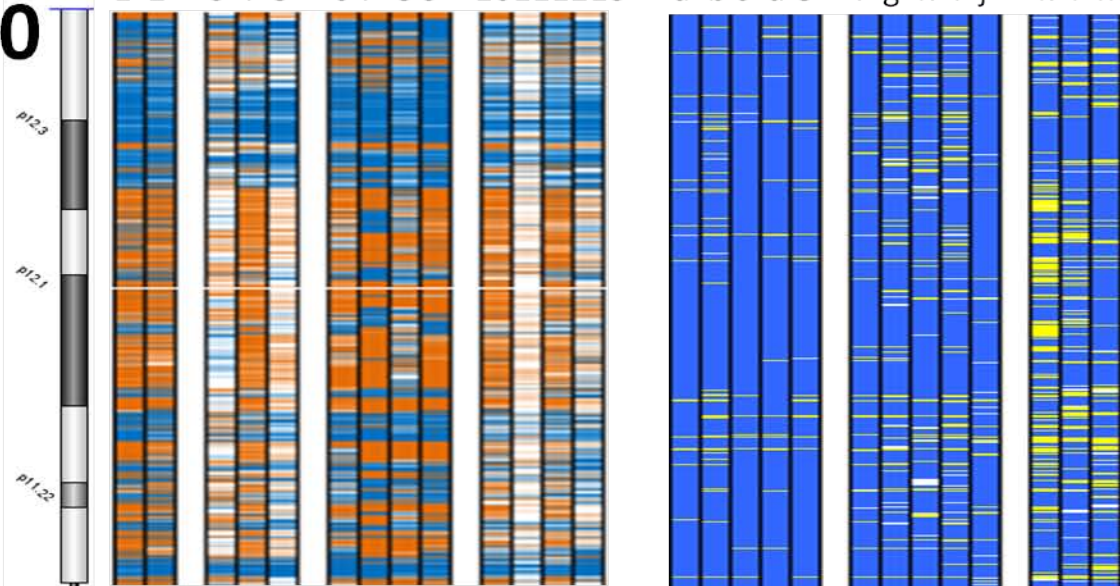

### McrBC method

- 1: FaDu HIF
- 2: Fadu
- 3: Malhavu
- 4: CL15
- 5: MDA-MB-231
- 6: MCF7
- 7: HepG2
- 8: huh7
- 9: CL10
- 10: breast tumor tissue
- 11: brain tumor tissue(no.RT619)
- 12: brain tumor tissue(no.t891)
- 13: brain tumor tissue(no.RT297)

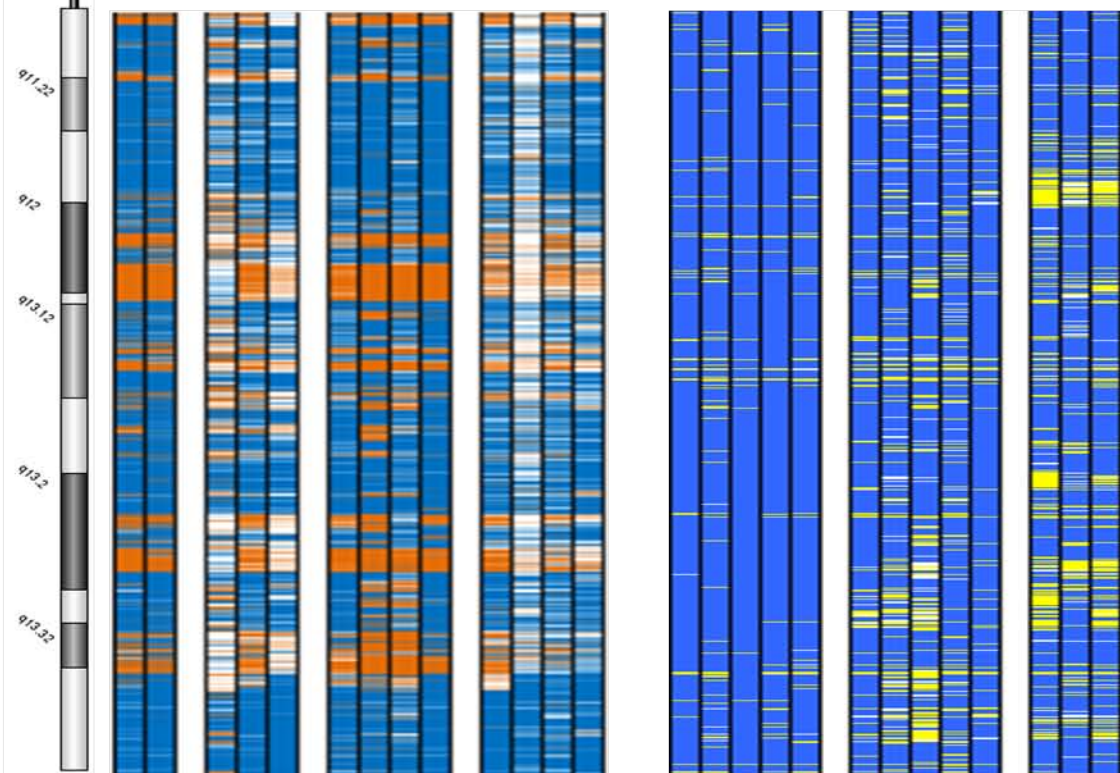

### TspRI-ExoIII method

- a: brain normal tissue
- b: leukocyte normal tissue
- c: testis normal tissue
- d: liver normal tissue
- e: breast normal tissue
- f: breast tumor tissue (no. 146)
- g: breast tumor tissue (no. 125)
- h: breast tumor tissue (no. 93)
- i: breast tumor tissue (no. 89)
- j: brain tumor tissue (no. SIR)
- k: MCF7
- l: MDA-MB-231
- m: HeLa

# 21

1 2 3 4 5 6 7 8 9 10 11 12 13 a b c d e f g h i j k l m

## McrBC method

- 1: FaDu HIF
- 2: Fadu
- 3: Malhavu
- 4: CL15
- 5: MDA-MB-231
- 6: MCF7
- 7: HepG2
- 8: huh7
- 9: CL10
- 10: breast tumor tissue
- 11: brain tumor tissue(no.RT619)
- 12: brain tumor tissue(no.t891)
- 13: brain tumor tissue(no.RT297)

## TspRI-ExoIII method

- a: brain normal tissue
- b: leukocyte normal tissue
- c: testis normal tissue
- d: liver normal tissue
- e: breast normal tissue
- f: breast tumor tissue (no. 146)
- g: breast tumor tissue (no. 125)
- h: breast tumor tissue (no. 93)
- i: breast tumor tissue (no. 89)
- j: brain tumor tissue (no. SIR)
- k: MCF7
- l: MDA-MB-231
- m: HeLa

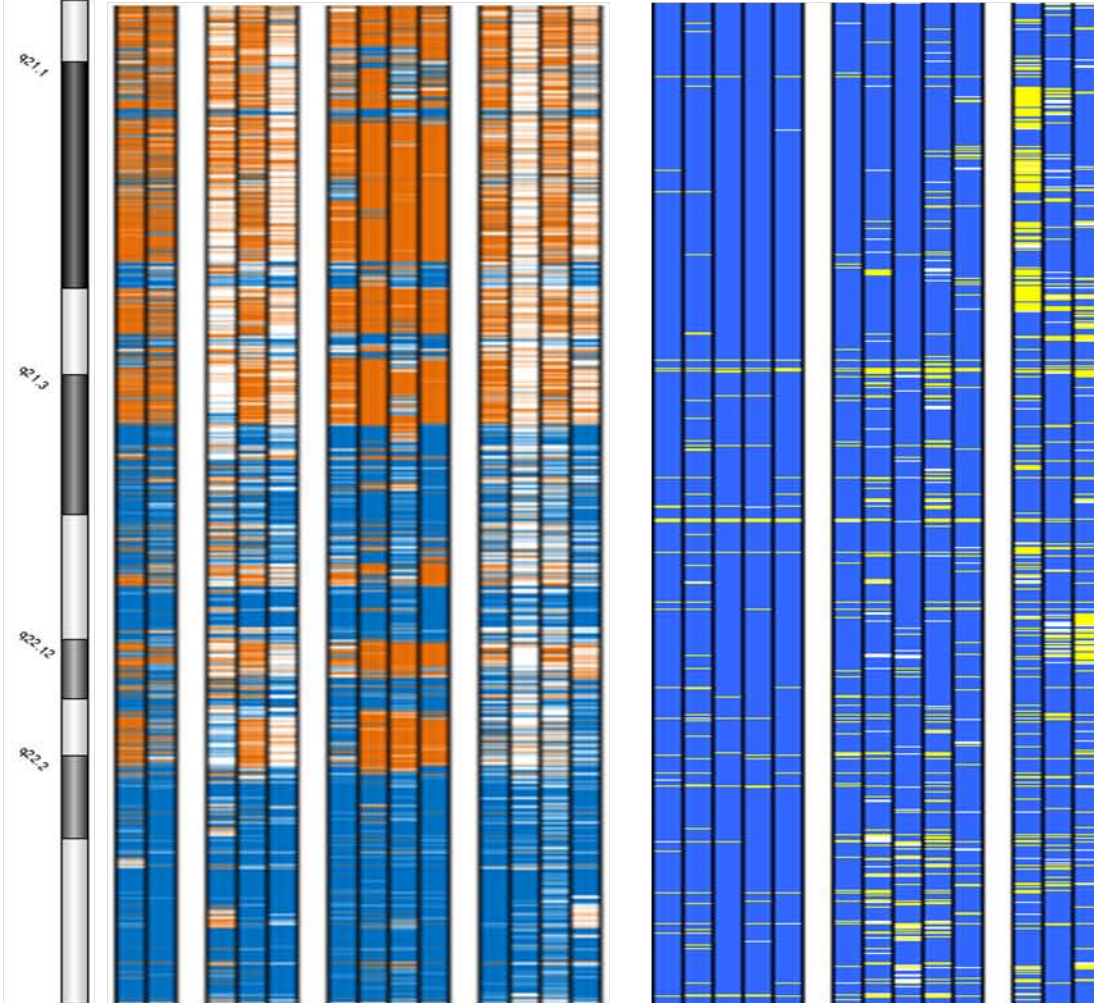

# 22

1 2 3 4 5 6 7 8 9 10 11 12 13 a b c d e f g h i j k l m

## McrBC method

- 1: FaDu HIF
- 2: Fadu
- 3: Malhavu
- 4: CL15
- 5: MDA-MB-231
- 6: MCF7
- 7: HepG2
- 8: huh7
- 9: CL10
- 10: breast tumor tissue
- 11: brain tumor tissue(no.RT619)
- 12: brain tumor tissue(no.t891)
- 13: brain tumor tissue(no.RT297)

## TspRI-ExoIII method

- a: brain normal tissue
- b: leukocyte normal tissue
- c: testis normal tissue
- d: liver normal tissue
- e: breast normal tissue
- f: breast tumor tissue (no. 146)
- g: breast tumor tissue (no. 125)
- h: breast tumor tissue (no. 93)
- i: breast tumor tissue (no. 89)
- j: brain tumor tissue (no. SIR)
- k: MCF7
- l: MDA-MB-231
- m: HeLa

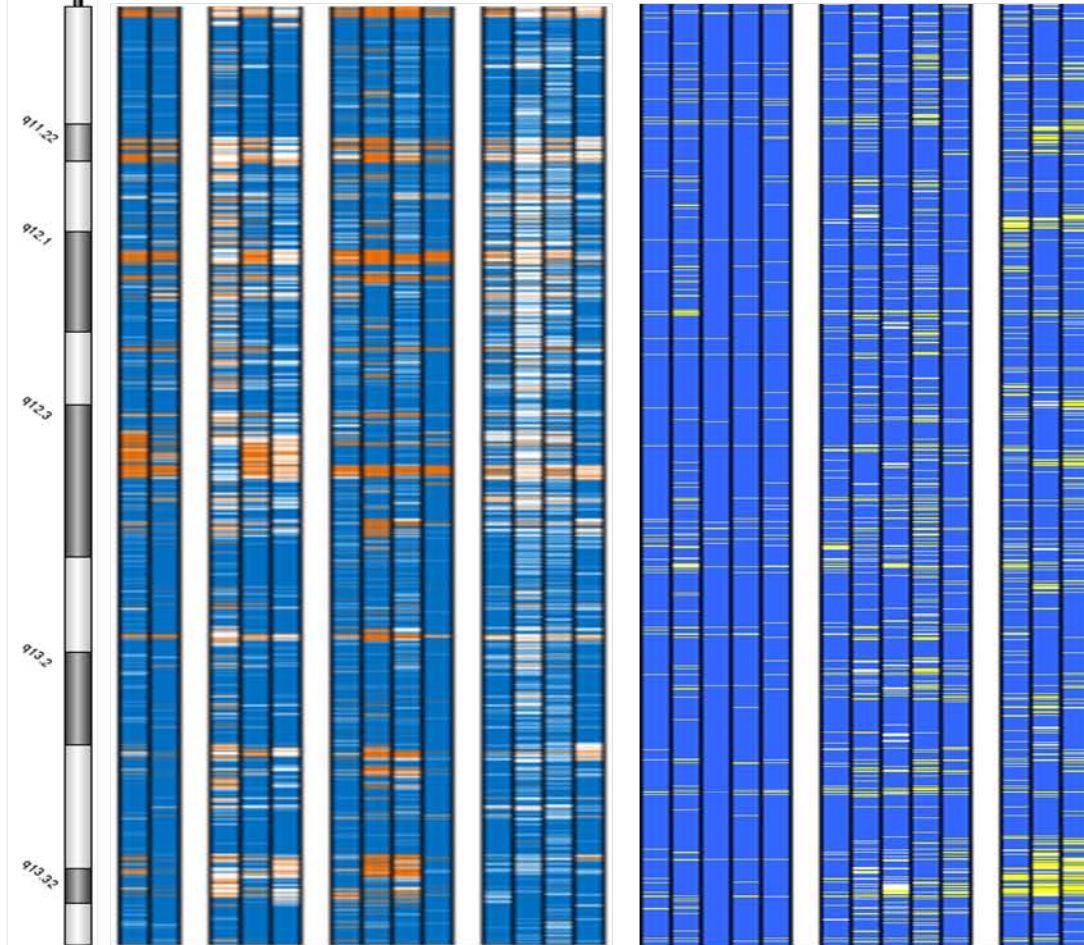

**X**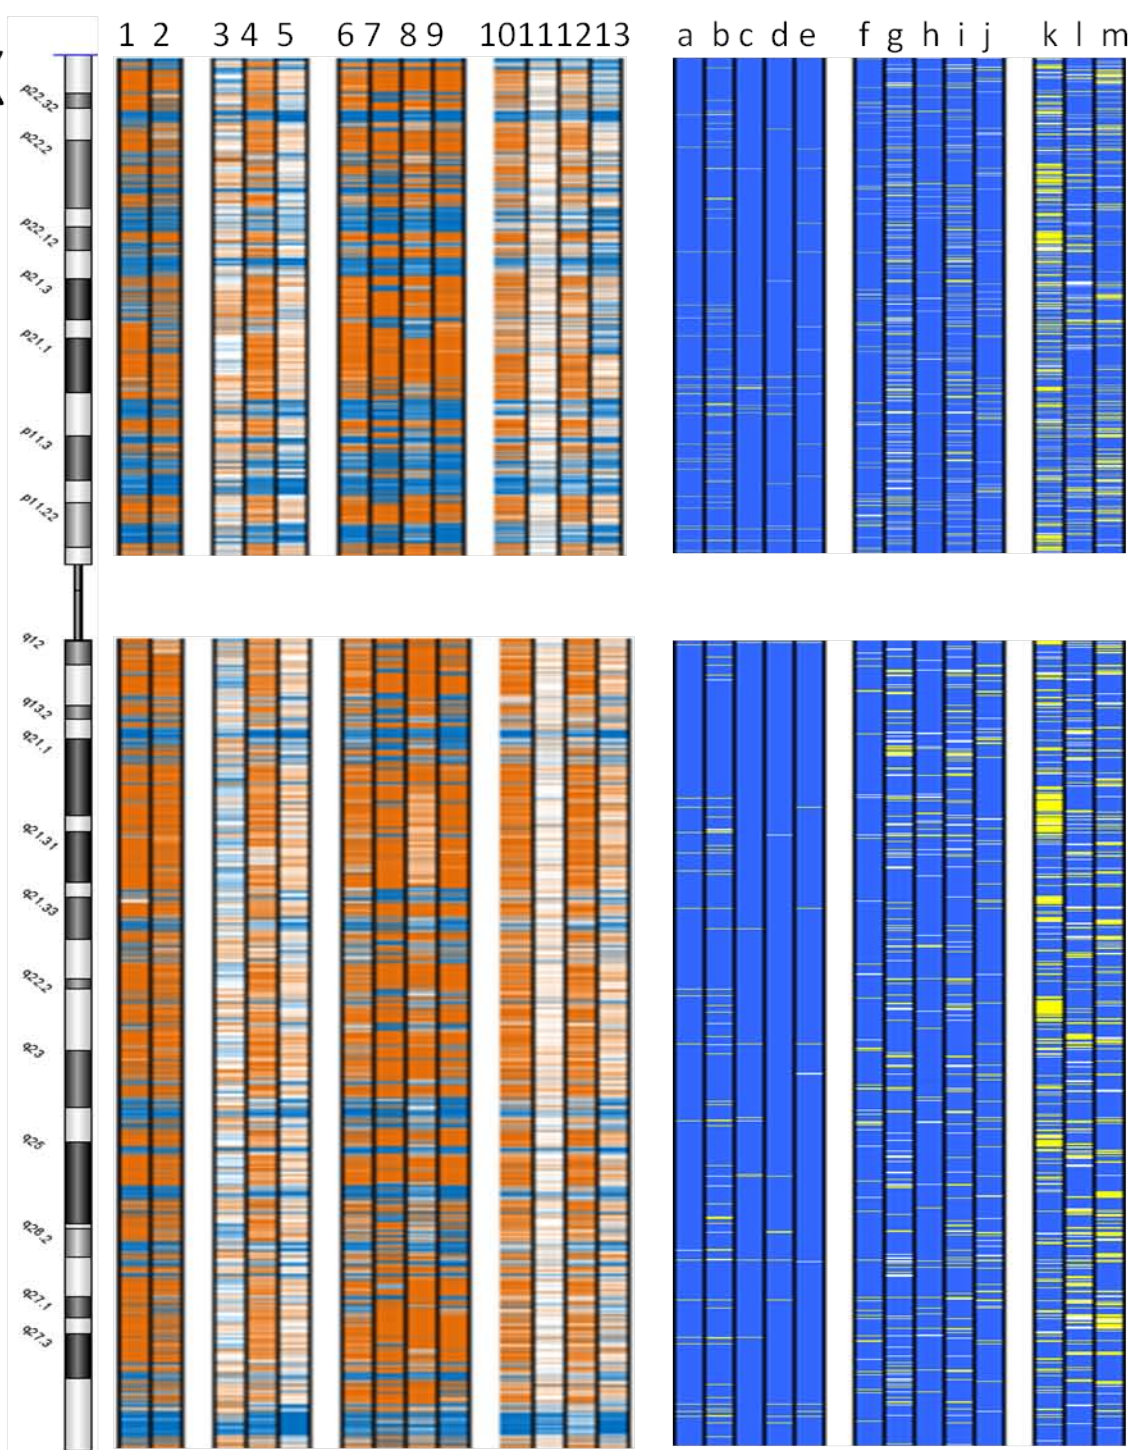**McrBC method**

- 1: FaDu HIF
- 2: Fadu
- 3: Malhavu
- 4: CL15
- 5: MDA-MB-231
- 6: MCF7
- 7: HepG2
- 8: huh7
- 9: CL10
- 10: breast tumor tissue
- 11: brain tumor tissue(no.RT619)
- 12: brain tumor tissue(no.t891)
- 13: brain tumor tissue(no.RT297)

**TspRI-ExoIII method**

- a: brain normal tissue
- b: leukocyte normal tissue
- c: testis normal tissue
- d: liver normal tissue
- e: breast normal tissue
- f: breast tumor tissue (no. 146)
- g: breast tumor tissue (no. 125)
- h: breast tumor tissue (no. 93)
- i: breast tumor tissue (no. 89)
- j: brain tumor tissue (no. SIR)
- k: MCF7
- l: MDA-MB-231
- m: HeLa

**Y**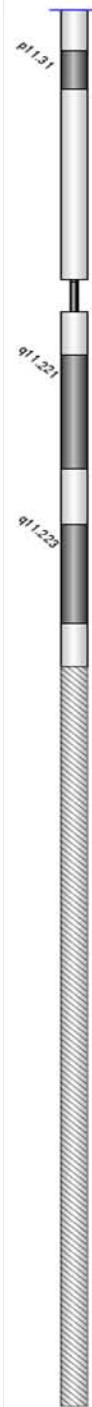

1 2 3 4 5 6 7 8 9 10 11 12 13 a b c d e f g h i j k l m

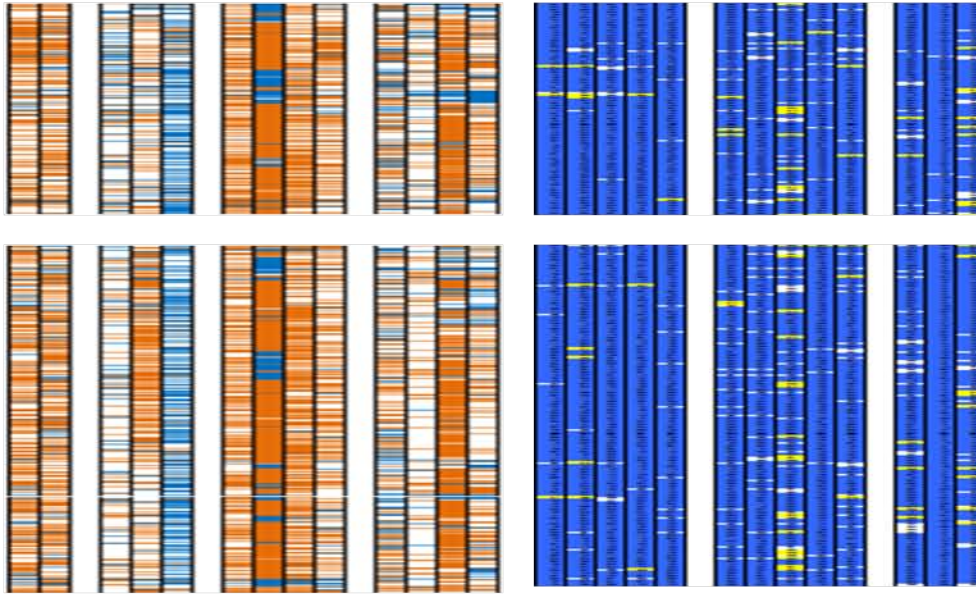

## McrBC method

- 1: FaDu HIF
- 2: Fadu
- 3: Malhavu
- 4: CL15
- 5: MDA-MB-231
- 6: MCF7
- 7: HepG2
- 8: huh7
- 9: CL10
- 10: breast tumor tissue
- 11: brain tumor tissue(no.RT619)
- 12: brain tumor tissue(no.t891)
- 13: brain tumor tissue(no.RT297)

## TspRI-ExoIII method

- a: brain normal tissue
- b: leukocyte normal tissue
- c: testis normal tissue
- d: liver normal tissue
- e: breast normal tissue
- f: breast tumor tissue (no. 146)
- g: breast tumor tissue (no. 125)
- h: breast tumor tissue (no. 93)
- i: breast tumor tissue (no. 89)
- j: brain tumor tissue (no. SIR)
- k: MCF7
- l: MDA-MB-231
- m: HeLa



**A2BP1** size 1,693,368 bp

Methylation pattern

**Normal breast**

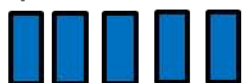

**MCF7**

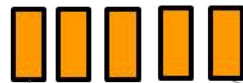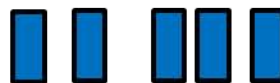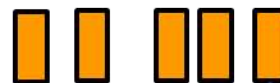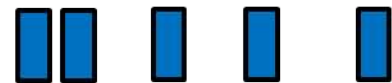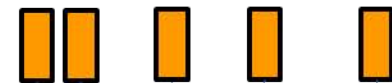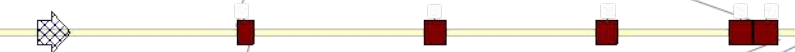

CpG island

5'UTR

5'UTR

5'UTR

5'UTR

3'UTR

Exon

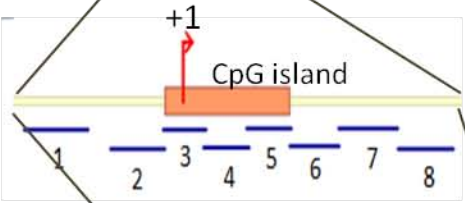

Methylation pattern

**Normal breast**

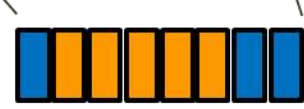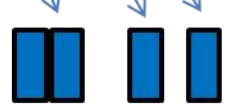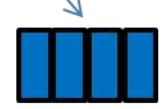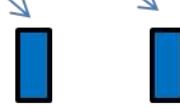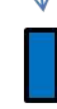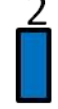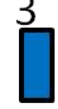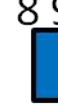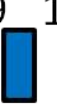

**MCF7**

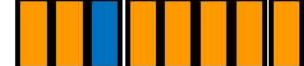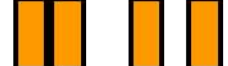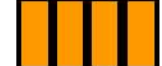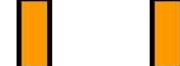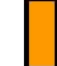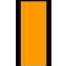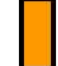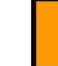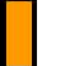

2 3 8 9 11

# Chromosome 16 as a model

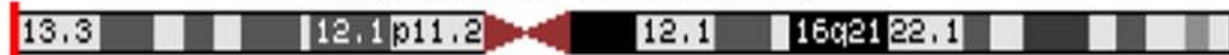

## (a) DNA methylation

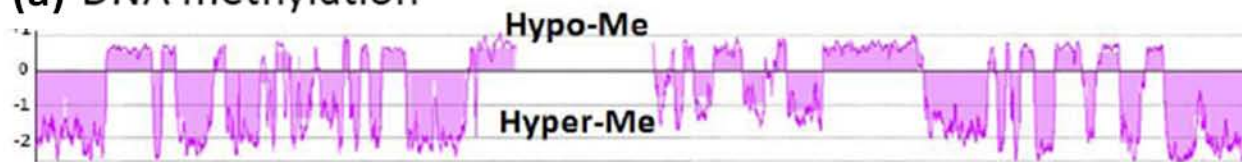

## (b) Histone modification

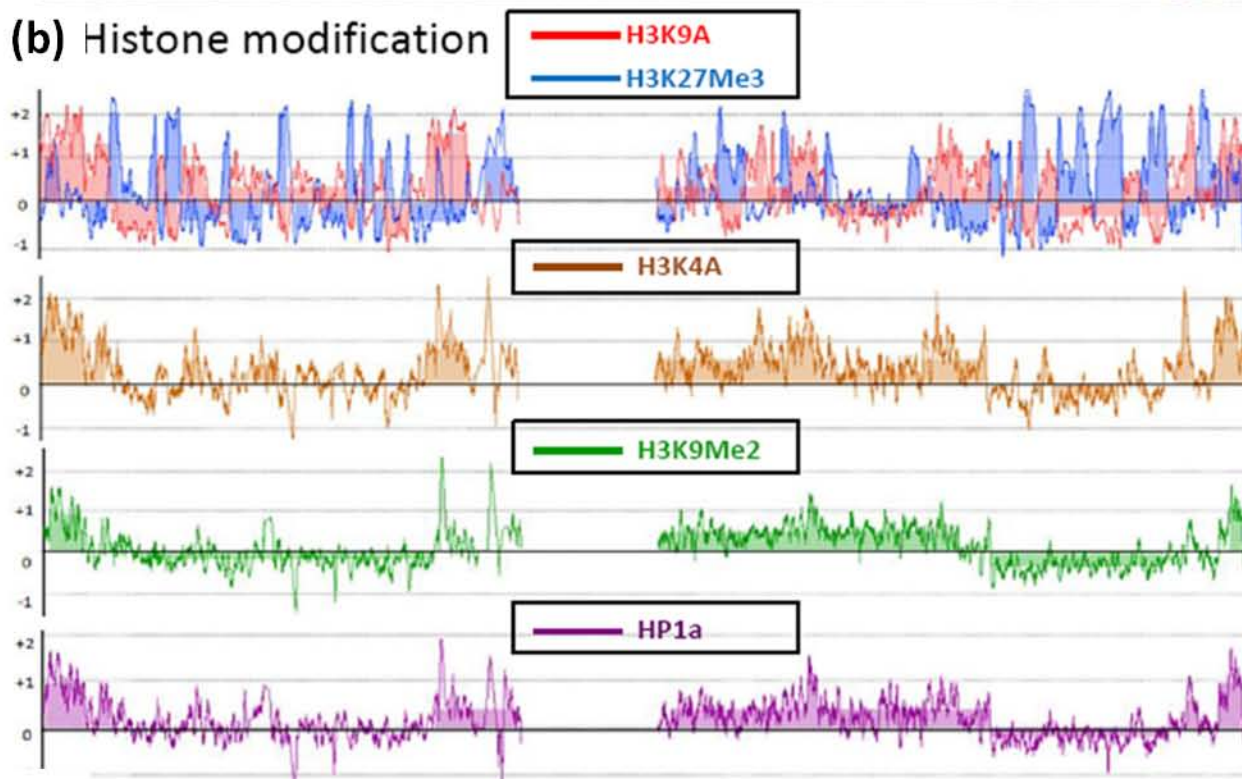

## (c) CpG density

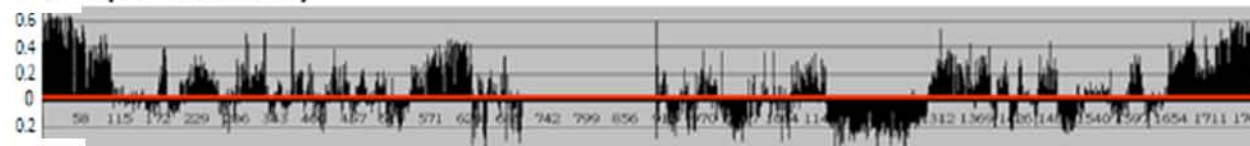

## (d) Gene density (UCSC)

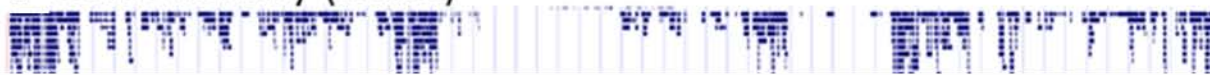

Supplement: cancers-03-01996-s001.pdf [file cancers-03-01996-s001.pdf]
